# Supplementary material
Source: PubMed Central journal article supplement (PMC7069760)
Supplement: EMS85955-supplement-Supplementary_information.pdf [file EMS85955-supplement-Supplementary_information.pdf]

## Supplementary Tables

**Supplementary Table 1.** Amount of transfected plasmids in each well of 96-well plate used for realization of individual logic functions using the firefly luciferase activity readout. Reporter *Renilla luciferase* (10 ng) was used for normalization of transfection.

| Input plasmids                                                                          | ng     | Reporter plasmid   | ng            | Inducer molecule |
|-----------------------------------------------------------------------------------------|--------|--------------------|---------------|------------------|
| <b>Protease orthogonality. Figure 1, Supplementary Figure 1d</b>                        |        |                    |               |                  |
| TEVp                                                                                    | 70     | CycLuc_TEVs        | 100           | /                |
| PPV                                                                                     | 70     |                    |               |                  |
| SbMVp                                                                                   | 70     |                    |               |                  |
| SuMMVp                                                                                  | 70     |                    |               |                  |
| TEVp                                                                                    | 70     | CycLuc_PPVs        | 100           | /                |
| PPV                                                                                     | 70     |                    |               |                  |
| SbMVp                                                                                   | 70     |                    |               |                  |
| SuMMVp                                                                                  | 70     |                    |               |                  |
| TEVp                                                                                    | 70     | CycLuc_SbMVs       | 100           | /                |
| PPV                                                                                     | 70     |                    |               |                  |
| SbMVp                                                                                   | 70     |                    |               |                  |
| SuMMVp                                                                                  | 70     |                    |               |                  |
| TEVp                                                                                    | 70     | CycLuc_SuMMVs      | 100           | /                |
| PPV                                                                                     | 70     |                    |               |                  |
| SbMVp                                                                                   | 70     |                    |               |                  |
| SuMMVp                                                                                  | 70     |                    |               |                  |
| <b>Split protease titration. Figure 1</b>                                               |        |                    |               |                  |
| FRB-nTEVp<br>FKBP-cTEVp                                                                 | 0; 0   | CycLuc_TEVs        | 100           | Rapamycin        |
|                                                                                         | 10; 10 |                    |               | Rapamycin        |
|                                                                                         | 20; 20 |                    |               | Rapamycin        |
|                                                                                         | 40; 40 |                    |               | Rapamycin        |
|                                                                                         | 70; 70 |                    |               | Rapamycin        |
|                                                                                         | 70; 70 |                    |               | /                |
| TEVp                                                                                    | 70     |                    |               | /                |
| FRB-nPPVp<br>FKBP-cPPVp                                                                 | 0; 0   | CycLuc_PPVs        | 100           | Rapamycin        |
|                                                                                         | 10; 10 |                    |               | Rapamycin        |
|                                                                                         | 20; 20 |                    |               | Rapamycin        |
|                                                                                         | 40; 40 |                    |               | Rapamycin        |
|                                                                                         | 70; 70 |                    |               | Rapamycin        |
|                                                                                         | 70; 70 |                    |               | /                |
| PPVp                                                                                    | 70     |                    |               | /                |
| FRB-nSbMVp<br>FKBP-cSbMVp                                                               | 0; 0   | CycLuc_SbMVs       | 100           | Rapamycin        |
|                                                                                         | 10; 10 |                    |               | Rapamycin        |
|                                                                                         | 20; 20 |                    |               | Rapamycin        |
|                                                                                         | 40; 40 |                    |               | Rapamycin        |
|                                                                                         | 70; 70 |                    |               | Rapamycin        |
|                                                                                         | 70; 70 |                    |               | /                |
| SbMVp                                                                                   | 70     |                    |               | /                |
| FRB-nSuMMVp<br>FKBP-cSuMMVp                                                             | 0; 0   | CycLuc_SuMMVs      | 100           | Rapamycin        |
|                                                                                         | 10; 10 |                    |               | Rapamycin        |
|                                                                                         | 20; 20 |                    |               | Rapamycin        |
|                                                                                         | 40; 40 |                    |               | Rapamycin        |
|                                                                                         | 70; 70 |                    |               | Rapamycin        |
|                                                                                         | 70; 70 |                    |               | /                |
| SuMMVp                                                                                  | 70     |                    |               | /                |
| <b>Optimization of split protease reconstitution. Figure 2b, Supplementary Figure 2</b> |        |                    |               |                  |
| ABI-cTEVp                                                                               | 5      | nLuc_AP4_TEVs_P3mS | 10            | ABA              |
| PYL1-nTEVp                                                                              | 10     | P3_cLuc            | 10            |                  |
|                                                                                         | 20     |                    |               |                  |
| FRB-nTEVp                                                                               | 50     | nLuc_AP4_TEVs_P3mS | 10            | Rapamycin        |
| FKBP-cTEVp                                                                              | 80     | P3_cLuc            | 10            |                  |
|                                                                                         | 110    |                    |               |                  |
| <b>Protease-inactivated module (logical negation). Figure 2d</b>                        |        |                    |               |                  |
| nLuc_TEVs_AP4                                                                           | 10     | PPVp               | 0; 10; 25; 50 |                  |
| P3_PPVp_cLuc                                                                            | 5      |                    |               |                  |
| P3_PPVs_cLuc                                                                            | 10     | TEVp               | 0; 10; 25; 50 |                  |
| nLuc_TEVs_AP4                                                                           | 5      |                    |               |                  |
| <b>Inverter. Supplementary Figure 12a</b>                                               |        |                    |               |                  |
| FRB-nPPVp                                                                               | 60     |                    |               |                  |
| FKBP-cPPVp                                                                              | 60     | nLuc_TEVs_AP10 10  | 10            | /                |
| P4_PPVs_cTEVp                                                                           | 40     | P9_TEVs_cLuc 10    | 10            |                  |
| P3_PPVs_nTEVp                                                                           | 40     |                    |               |                  |
| FRB-nPPVp                                                                               | 60     |                    |               |                  |
| FKBP-cPPVp                                                                              | 60     | nLuc_TEVs_AP10 10  | 10            | Rapamycin        |
| P4_PPVs_cTEVp                                                                           | 40     | P9_TEVs_cLuc 10    | 10            |                  |
| P3_PPVs_nTEVp                                                                           | 40     |                    |               |                  |
| P4_PPVs_cTEVp                                                                           | 40     | nLuc_TEVs_AP10 10  | 10            | /                |
| P3_PPVs_nTEVp                                                                           | 40     | P9_TEVs_cLuc 10    | 10            |                  |
| PPVp                                                                                    | 90     | nLuc_TEVs_AP10 10  | 10            | /                |
| P4_PPVs_cTEVp                                                                           | 40     | P9_TEVs_cLuc 10    | 10            |                  |
| P3_PPVs_nTEVp                                                                           | 40     |                    |               |                  |
| <b>Double Inverter. Figure 4b, Supplementary Figure 12b</b>                             |        |                    |               |                  |
| P9_SbMVs_nPPVp                                                                          | 20     |                    |               |                  |
| P10_SbMVs_cPPVp                                                                         | 20     |                    |               |                  |
| P4_PPVs_cTEVp                                                                           | 10     | cycLuc_TEVs        | 70            | Rapamycin        |
| P3_PPVs_nTEVp                                                                           | 10     |                    |               |                  |
| FRB-nSbMVp                                                                              | 55     |                    |               |                  |
| FKBP-cSbMVp                                                                             | 55     |                    |               |                  |
| P9_SbMVs_nPPVp                                                                          | 20     |                    |               |                  |
| P10_SbMVs_cPPVp                                                                         | 20     | cycLuc_TEVs        | 70            | /                |
| P4_PPVs_cTEVp                                                                           | 10     |                    |               |                  |
| P3_PPVs_nTEVp                                                                           | 10     |                    |               |                  |
| FRB-nSbMVp                                                                              | 55     |                    |               |                  |
| FKBP-cSbMVp                                                                             | 55     |                    |               |                  |
| P9_SbMVs_nPPVp                                                                          | 20     |                    |               |                  |
| P10_SbMVs_cPPVp                                                                         | 20     | cycLuc_TEVs        | 70            | Rapamycin        |
| P4_PPVs_cTEVp                                                                           | 10     |                    |               |                  |
| P3_PPVs_nTEVp                                                                           | 10     |                    |               |                  |
| SbMVp                                                                                   | 55     |                    |               |                  |
| P9_SbMVs_nPPVp                                                                          | 20     |                    |               |                  |
| P10_SbMVs_cPPVp                                                                         | 20     | cycLuc_TEVs        | 70            | /                |
| P4_PPVs_cTEVp                                                                           | 10     |                    |               |                  |
| P3_PPVs_nTEVp                                                                           | 10     |                    |               |                  |
| SbMVp                                                                                   | 55     |                    |               |                  |
| P9_SbMVs_nPPVp                                                                          | 20     |                    |               |                  |
| P10_SbMVs_cPPVp                                                                         | 20     | cycLuc_TEVs        | 70            | /                |
| P4_PPVs_cTEVp                                                                           | 10     |                    |               |                  |
| P3_PPVs_nTEVp                                                                           | 10     |                    |               |                  |
| <b>Two-layer protease cascade. Figure 4a, Supplementary Figure 11</b>                   |        |                    |               |                  |
| SbMVp                                                                                   | 90     |                    |               |                  |
| AP4_SbMVs_P3_nTEVp                                                                      | 20     | cycLuc_TEVs        | 70            | /                |
| P4_PPVs_cTEVp                                                                           | 5      |                    |               |                  |
| AP4_SbMVs_P3_nTEVp                                                                      | 20     | cycLuc_TEVs        | 70            | /                |
| P4_PPVs_cTEVp                                                                           | 5      |                    |               |                  |
| SbMVp                                                                                   | 90     |                    |               |                  |
| cTEVp*_AP4_SbMVs_P3_nTEVp                                                               | 20     | cycLuc_TEVs        | 70            | /                |
| P4_PPVs_cTEVp                                                                           | 5      |                    |               |                  |
| cTEVp*_AP4_SbMVs_P3_nTEVp                                                               | 90     |                    |               |                  |
| cTEVp*_AP4_SbMVs_P3_nTEVp                                                               | 20     | cycLuc_TEVs        | 70            | /                |
| P4_PPVs_cTEVp                                                                           | 5      |                    |               |                  |
| <b>TEVp variants. Supplementary Figure 1b</b>                                           |        |                    |               |                  |
| /                                                                                       | 0      |                    |               |                  |
| TEVp                                                                                    | 100    |                    |               |                  |
| TEVpE                                                                                   | 100    | Fluc_TEVs          | 25            | /                |
| TEVpH                                                                                   | 100    |                    |               |                  |
| /                                                                                       | 0      |                    |               |                  |
| TEVp                                                                                    | 100    |                    |               |                  |
| TEVpE                                                                                   | 100    | Fluc_TEVsE         | 25            | /                |
| TEVpH                                                                                   | 100    |                    |               |                  |
| /                                                                                       | 0      |                    |               |                  |
| TEVp                                                                                    | 100    |                    |               |                  |
| TEVpE                                                                                   | 100    | Fluc_TEVsH         | 25            | /                |
| TEVpH                                                                                   | 100    |                    |               |                  |

**Supplementary Table 2.** Amount of transfected plasmids in each well of 96-well plate used for realization of individual logic functions using the firefly luciferase activity readout. Reporter *Renilla luciferase* (10 ng) was used for normalization of transfection.

| SPOC-based logic functions. Figure 3. Supplementary Figure 9 |   |                      |                              |                            |
|--------------------------------------------------------------|---|----------------------|------------------------------|----------------------------|
| A                                                            | B | Input plasmids (ng)  | Logic function plasmids (ng) |                            |
| <b>A</b>                                                     |   |                      |                              |                            |
| 0                                                            | 0 | / /                  | /                            |                            |
| 1                                                            | 0 | pCMV_TEVp            | 90                           | nLuc_AP4_TEVs_P3mS 10      |
| 0                                                            | 1 | pCMV_PPVp            | 90                           | P3_cLuc 10                 |
| 1                                                            | 1 | pCMV_TEVp, pCMV_PPVp | 90; 90                       |                            |
| <b>B</b>                                                     |   |                      |                              |                            |
| 0                                                            | 0 | / /                  | /                            |                            |
| 1                                                            | 0 | pCMV_TEVp            | 90                           | nLuc_AP4_PPVs_P3mS 10      |
| 0                                                            | 1 | pCMV_PPVp            | 90                           | P3_cLuc 10                 |
| 1                                                            | 1 | pCMV_TEVp, pCMV_PPVp | 90; 90                       |                            |
| <b>NOT A</b>                                                 |   |                      |                              |                            |
| 0                                                            | 0 | / /                  | /                            |                            |
| 1                                                            | 0 | pCMV_TEVp            | 90                           | nLuc_TEVs_AP4 10           |
| 0                                                            | 1 | pCMV_PPVp            | 20                           | P3_cLuc 10                 |
| 1                                                            | 1 | pCMV_TEVp, pCMV_PPVp | 90; 20                       |                            |
| <b>NOT B</b>                                                 |   |                      |                              |                            |
| 0                                                            | 0 | / /                  | /                            |                            |
| 1                                                            | 0 | pCMV_TEVp            | 90                           | nLuc_AP4 10                |
| 0                                                            | 1 | pCMV_PPVp            | 90                           | P3_PPV_cLuc 10             |
| 1                                                            | 1 | pCMV_TEVp, pCMV_PPVp | 90; 90                       |                            |
| <b>AND</b>                                                   |   |                      |                              |                            |
| 0                                                            | 0 | / /                  | /                            |                            |
| 1                                                            | 0 | pCMV_TEVp            | 90                           | nLuc_AP4_TEVs_P3mS 10      |
| 0                                                            | 1 | pCMV_PPVp            | 90                           | AP4_PPV_P3_cLuc 10         |
| 1                                                            | 1 | pCMV_TEVp, pCMV_PPVp | 90; 90                       |                            |
| <b>OR</b>                                                    |   |                      |                              |                            |
| 0                                                            | 0 | / /                  | /                            |                            |
| 1                                                            | 0 | pCMV_TEVp            | 90                           | nLuc_AP4_TEVs_PPVs_P3mS 10 |
| 0                                                            | 1 | pCMV_PPVp            | 90                           | P3_cLuc 10                 |
| 1                                                            | 1 | pCMV_TEVp, pCMV_PPVp | 90; 90                       |                            |
| <b>NOR</b>                                                   |   |                      |                              |                            |
| 0                                                            | 0 | / /                  | /                            |                            |
| 1                                                            | 0 | pCMV_TEVp            | 90                           | nLuc_TEVs_AP4 10           |
| 0                                                            | 1 | pCMV_PPVp            | 90                           | P3_PPV_cLuc 10             |
| 1                                                            | 1 | pCMV_TEVp, pCMV_PPVp | 90; 90                       |                            |
| <b>A imply B</b>                                             |   |                      |                              |                            |
| 0                                                            | 0 | / /                  | /                            |                            |
| 1                                                            | 0 | pCMV_TEVp            | 90                           | nLuc_AP4_TEVs_P3mS 10      |
| 0                                                            | 1 | pCMV_PPVp            | 20                           | P3_PPV_cLuc 10             |
| 1                                                            | 1 | pCMV_TEVp, pCMV_PPVp | 90; 20                       |                            |
| <b>B imply A</b>                                             |   |                      |                              |                            |
| 0                                                            | 0 | / /                  | /                            |                            |
| 1                                                            | 0 | pCMV_TEVp            | 90                           | AP4mS_PPV_P3_cLuc 10       |
| 0                                                            | 1 | pCMV_PPVp            | 20                           | nLuc_TEVs_AP4 10           |
| 1                                                            | 1 | pCMV_TEVp, pCMV_PPVp | 90; 20                       |                            |
| <b>NAND</b>                                                  |   |                      |                              |                            |
| 0                                                            | 0 | / /                  | /                            |                            |
| 1                                                            | 0 | pCMV_TEVp            | 90                           | nLuc_AP10 10               |
| 0                                                            | 1 | pCMV_PPVp            | 90                           | P9_PPVs_cLuc 10            |
| 1                                                            | 1 | pCMV_PPVp, pCMV_PPVp | 90; 90                       | AP4mS_PPVs_P3_TEVs_cLuc 20 |
| 1                                                            | 1 | pCMV_TEVp, pCMV_PPVp | 90; 90                       | nLuc-TEVs-AP4 20           |

| SPOC-based logic functions Figure 3. Supplementary Figure 9 |   |                      |                              |                       |
|-------------------------------------------------------------|---|----------------------|------------------------------|-----------------------|
| A                                                           | B | Input plasmids (ng)  | Logic function plasmids (ng) |                       |
| <b>XOR (A imply B + orthogonal B imply A)</b>               |   |                      |                              |                       |
| 0                                                           | 0 | / /                  | /                            | nLuc_AP4_TEVs_P3mS 10 |
| 1                                                           | 0 | pCMV_TEVp            | 90                           | P3_PPV_cLuc 10        |
| 0                                                           | 1 | pCMV_PPVp            | 25                           | nLuc_AP10_PPV_P9mS 10 |
| 1                                                           | 1 | pCMV_TEVp, pCMV_PPVp | 90; 25                       | P9_TEVs_cLuc 10       |
| <b>XNOR (AND + orthogonal NOR)</b>                          |   |                      |                              |                       |
| 0                                                           | 0 | / /                  | /                            | nLuc_AP4_TEVs_P3mS 10 |
| 1                                                           | 0 | pCMV_TEVp            | 90                           | AP4_PPV_P3_cLuc 10    |
| 0                                                           | 1 | pCMV_PPVp            | 90                           | nLuc_PPV_AP10 13      |
| 1                                                           | 1 | pCMV_TEVp, pCMV_PPVp | 90; 90                       | P9_TEVs_cLuc 13       |
| <b>A imply B (AND + orthogonal NOT A)</b>                   |   |                      |                              |                       |
| 0                                                           | 0 | / /                  | /                            | nLuc_AP4_TEVs_P3mS 10 |
| 1                                                           | 0 | pCMV_TEVp            | 90                           | AP4_PPV_P3_cLuc 10    |
| 0                                                           | 1 | pCMV_PPVp            | 20                           | nLuc_AP10 10          |
| 1                                                           | 1 | pCMV_TEVp, pCMV_PPVp | 90; 20                       | P9_TEVs_cLuc 10       |
| <b>B imply A (A + orthogonal NOR)</b>                       |   |                      |                              |                       |
| 0                                                           | 0 | / /                  | /                            | nLuc_AP4_TEVs_P3mS 10 |
| 1                                                           | 0 | pCMV_TEVp            | 90                           | P3_cLuc 10            |
| 0                                                           | 1 | pCMV_PPVp            | 90                           | nLuc_PPV_AP10 20      |
| 1                                                           | 1 | pCMV_TEVp, pCMV_PPVp | 90; 90                       | P9_TEVs_cLuc 20       |

**Supplementary Table 3.** Amount of transfected plasmids in each well of 96-well plate used for realization of individual logic functions using the firefly luciferase activity readout. Reporter *Renilla luciferase* (10 ng) was used for normalization of transfection.

| Input plasmids                                                                              | ng             | Reporter plasmid                                                           | ng                    |
|---------------------------------------------------------------------------------------------|----------------|----------------------------------------------------------------------------|-----------------------|
| <b>Orthogonality of split proteases, Supplementary Figure 1f,g</b>                          |                |                                                                            |                       |
| FRB_nTEVp                                                                                   | 60             | cycLuc_TEVs                                                                | 90                    |
| FKBP_cTEVp                                                                                  | 60             |                                                                            |                       |
| FRB_nPPVp                                                                                   | 60             |                                                                            |                       |
| FKBP_cPPVp                                                                                  | 60             |                                                                            |                       |
| FRB_nTEVp                                                                                   | 60             | cycLuc_PPVs                                                                | 90                    |
| FKBP_cTEVp                                                                                  | 60             |                                                                            |                       |
| FRB_nPPVp                                                                                   | 60             |                                                                            |                       |
| FKBP_cPPVp                                                                                  | 60             |                                                                            |                       |
| <b>AND logic function protease titration, Supplementary Figure 10</b>                       |                |                                                                            |                       |
| pCMV_TEVp                                                                                   | 0;10;25;50     | nLuc_AP4_TEVs_P3mS                                                         | 10                    |
| pCMV_PPVp                                                                                   | 0; 10; 25; 50  | AP4mS_PPVs_P3_cLu                                                          | 10                    |
| <b>A logic function titration of autoinhibitor and displacer. Supplementary Figure 5b,c</b> |                |                                                                            |                       |
| pCMV_TEVp                                                                                   | 50             | nLuc_AP4_TEVs_P3mS                                                         | 0; 2,5; 5; 10         |
|                                                                                             |                | P3_cLuc                                                                    | 0; 2,5; 5; 10         |
| pCMV_TEVp                                                                                   | 0              | nLuc_AP4_TEVs_P3mS                                                         | 0; 2,5; 5; 10         |
|                                                                                             |                | P3_cLuc                                                                    | 0; 2,5; 5; 10         |
| <b>A logic function CC variations. Supplementary Figure 6c</b>                              |                |                                                                            |                       |
| pCMV_TEVp                                                                                   | 0; 50          | nLuc_AP4_TEVs_P3mS                                                         | 10                    |
|                                                                                             |                | P3_cLuc                                                                    | 0; 2,5; 5; 10; 15; 20 |
| pCMV_TEVp                                                                                   | 0; 50          | nLuc_AP4_TEVs_P3mS <sup>2</sup> A <sub>2</sub>                             | 10                    |
|                                                                                             |                | P3_cLuc                                                                    | 0; 2,5; 5; 10; 15; 20 |
| pCMV_TEVp                                                                                   | 0; 50          | nLuc_AP4_TEVs_P3mS <sup>1</sup> A <sup>2</sup> A                           | 10                    |
|                                                                                             |                | P3_cLuc                                                                    | 0; 2,5; 5; 10; 15; 20 |
| pCMV_TEVp                                                                                   | 0; 50          | nLuc_AP4_TEVs_P3mS <sup>1</sup> A <sub>2</sub> <sup>2</sup> A <sub>2</sub> | 10                    |
|                                                                                             |                | P3_cLuc                                                                    | 0; 2,5; 5; 10; 15; 20 |
| <b>Coiled-coil orthogonality. Supplementary Figure 3c</b>                                   |                |                                                                            |                       |
| nLuc_AP4;                                                                                   | 25; 50; 100    | P3_cLuc                                                                    | 100                   |
| nLuc_AP10;                                                                                  | 100            | P3_cLuc                                                                    | 100                   |
| nLuc_AP10;                                                                                  | 25; 50; 100    | P9_cLuc                                                                    | 100                   |
| nLuc_AP4;                                                                                   | 100            | P9_cLuc                                                                    | 100                   |
| <b>Coiled-coil orthogonality. Supplementary Figure 3d</b>                                   |                |                                                                            |                       |
| P3cLuc                                                                                      | 0; 25; 50; 100 | nLucAP4                                                                    | 10; 25; 50            |
| <b>Protease-inactivated module (logical negation). Supplementary Figure 7b</b>              |                |                                                                            |                       |
| nLuc_TEVs_AP4                                                                               | 0; 10; 25; 50  | PPVp                                                                       | 0; 10; 25; 50         |
| P3_PPVs_cLuc                                                                                | 5              |                                                                            |                       |

**Supplementary Table 4.** Amount of transfected plasmids in each well of 96-well plate used for realization of individual logic functions using the firefly luciferase activity readout. Reporter *Renilla luciferase* (10 ng) was used for normalization of transfection.

| Input                                             | ng                   | Logic function plasmids | ng | Reporter    | ng |
|---------------------------------------------------|----------------------|-------------------------|----|-------------|----|
| <b>Logic function with HIVp. Figure 4c</b>        |                      |                         |    |             |    |
| <b>NIMPLY</b>                                     |                      |                         |    |             |    |
| /                                                 | /                    |                         |    |             |    |
| pCMV_HIVp                                         | 80                   | cTEV*_AP4_HIVs_P3_nTEV  | 10 | cycLuc_TEVs | 60 |
| pCMV_PPVp                                         | 90                   | P4mS_cTEV               | 5  |             |    |
| pCMV_HIVp, pCMV_PPVp                              | 80; 90               |                         |    |             |    |
| <b>Logic function AND ; Supplementary Fig. 13</b> |                      |                         |    |             |    |
| <b>N2A</b>                                        |                      |                         |    |             |    |
| 0 0                                               | /                    |                         |    |             |    |
| 1 0                                               | pCMV_TEVp            | nLuc_AP4_TEVs_P3mS      | 10 |             |    |
| 0 1                                               | pCMV_PPVp            | AP4_PPV_P3_cLuc         | 10 |             |    |
| 1 1                                               | pCMV_TEVp, pCMV_PPVp |                         |    |             |    |
| <b>HeLa</b>                                       |                      |                         |    |             |    |
| 0 0                                               | /                    |                         |    |             |    |
| 1 0                                               | pCMV_TEVp            | nLuc_AP4_TEVs_P3mS      | 10 |             |    |
| 0 1                                               | pCMV_PPVp            | AP4_PPV_P3_cLuc         | 10 |             |    |
| 1 1                                               | pCMV_TEVp, pCMV_PPVp |                         |    |             |    |
| <b>NIH</b>                                        |                      |                         |    |             |    |
| 0 0                                               | /                    |                         |    |             |    |
| 1 0                                               | pCMV_TEVp            | nLuc_AP4_TEVs_P3mS      | 10 |             |    |
| 0 1                                               | pCMV_PPVp            | AP4_PPV_P3_cLuc         | 10 |             |    |
| 1 1                                               | pCMV_TEVp, pCMV_PPVp |                         |    |             |    |
| <b>CHO</b>                                        |                      |                         |    |             |    |
| 0 0                                               | /                    |                         |    |             |    |
| 1 0                                               | pCMV_TEVp            | nLuc_AP4_TEVs_P3mS      | 10 |             |    |
| 0 1                                               | pCMV_PPVp            | AP4_PPV_P3_cLuc         | 10 |             |    |
| 1 1                                               | pCMV_TEVp, pCMV_PPVp |                         |    |             |    |

**Supplementary Table 5.** Amount of transfected plasmids in each well of 96-well plate used for realization of individual logic functions using the firefly luciferase activity readout. Reporter *Renilla luciferase* (10 ng) was used for normalization of transfection.

| Inducible SPOC-based logic functions; Figure 5e-h; Supplementary Figure 14 |   |                |                       |        |                         |    |
|----------------------------------------------------------------------------|---|----------------|-----------------------|--------|-------------------------|----|
| A                                                                          | B | Inducer        | Input plasmids        | ng     | Logic function plasmids | ng |
| <b>B</b>                                                                   |   |                |                       |        |                         |    |
| 0                                                                          | 0 | /              |                       |        |                         |    |
| 1                                                                          | 0 | ABA            | ABI_cTEVp; PYL1_nTEVp | 90; 90 | nLuc_AP4_PPVs_P3mS      | 10 |
| 0                                                                          | 1 | Rapamycin      | FRB_nPPVp; FKBP_cPPVp | 10; 10 | P3_cLuc                 | 10 |
| 1                                                                          | 1 | ABA, Rapamycin |                       |        |                         |    |
| <b>AND</b>                                                                 |   |                |                       |        |                         |    |
| 0                                                                          | 0 | /              |                       |        |                         |    |
| 1                                                                          | 0 | ABA            | ABI_cTEVp; PYL1_nTEVp | 90; 90 | nLuc_AP4_TEVs_P3mS      | 10 |
| 0                                                                          | 1 | Rapamycin      | FRB_nPPVp; FKBP_cPPVp | 10; 10 | AP4_PPV_P3_cLuc         | 10 |
| 1                                                                          | 1 | ABA, Rapamycin |                       |        |                         |    |
| <b>OR</b>                                                                  |   |                |                       |        |                         |    |
| 0                                                                          | 0 | /              |                       |        |                         |    |
| 1                                                                          | 0 | Rapamycin      | FRB_nTEVp; FKBP_cTEVp | 70; 70 | nLuc_AP4_TEVs_PPVs_P3mS | 10 |
| 0                                                                          | 1 | ABA            | ABI_cPPVp; PYL1_nPPVp | 30; 30 | P3_cLuc                 | 10 |
| 1                                                                          | 1 | Rapamycin; ABA |                       |        |                         |    |

**Supplementary Table 6.** Amount of transfected plasmids in each well of 96-well plate used for realization of individual logic functions using the firefly luciferase activity readout. Reporter *Renilla luciferase* (10 ng) was used for normalization of transfection.

| Input plasmids                                                               | ng | Reporter plasmid   | ng | Inducer molecule |
|------------------------------------------------------------------------------|----|--------------------|----|------------------|
| <b><i>In situ</i> kinetics of split protease reconstitution, Figure 5b,c</b> |    |                    |    |                  |
| <b>A</b>                                                                     |    |                    |    |                  |
| ABI-cTEVp                                                                    | 10 | nLuc_AP4_TEVs_P3mS | 10 | ABA              |
| PYL1-nTEVp                                                                   | 10 | P3_cLuc            | 10 |                  |
| <b>B</b>                                                                     |    |                    |    |                  |
| FRB-nPPVp                                                                    | 90 | nLuc_AP4           | 10 | Rapamycin        |
| FKBP-cPPVp                                                                   | 90 | AP4mS_PPVs_P3_cLuc | 10 |                  |
| <b><i>In situ</i> translational activation, Figure 5b,c</b>                  |    |                    |    |                  |
| dCAS9_ABI                                                                    | 25 | pmin_fLuc          | 20 | ABA              |
| PYL_VPR                                                                      | 25 | sgRNA              | 25 |                  |

**Supplementary Table 7.** Amount of transfected plasmids in each well of a 6-well plate used for the western blot (**Supplementary Figure 15**).

| <b>Input plasmids</b>                            | <b>ng</b> | <b>Inducer molecule</b> |
|--------------------------------------------------|-----------|-------------------------|
| <b>Immunoblotting split luciferase reporters</b> |           |                         |
| nLUC_AP4_TEVs_P3mS                               | 1000      | 0                       |
|                                                  |           | ABA                     |
|                                                  |           | Rapamycin               |
|                                                  |           | ABA+Rapamycin           |
| AP4ms_PPVs_P3_cLuc                               | 1000      | 0                       |
|                                                  |           | ABA                     |
|                                                  |           | Rapamycin               |
|                                                  |           | ABA+Rapamycin           |
| pCDNA3                                           | 1000      | 0                       |
|                                                  |           | ABA                     |
|                                                  |           | Rapamycin               |
|                                                  |           | ABA+Rapamycin           |
| <b>Immunoblotting split protease</b>             |           |                         |
| pcDNA3                                           | 1000      | 0                       |
|                                                  |           | Rapamycin               |
| PYL1_nTEVp                                       | 1000      | 0                       |
|                                                  |           | ABA                     |
| ABI_cTEVp                                        | 1000      | 0                       |
|                                                  |           | ABA                     |
| PYL1_nPPVp                                       | 1000      | 0                       |
|                                                  |           | ABA                     |
| ABI1_cPPVp                                       | 1000      | 0                       |
|                                                  |           | ABA                     |
| pcDNA3                                           | 1000      | 0                       |
|                                                  |           | ABA                     |

## Supplementary Table 8. Amino acid sequences of constructs used in this study

### Potyviral proteases

|        |                                                                                   |                                                                                                                                                                                                                                                                                                                   |
|--------|-----------------------------------------------------------------------------------|-------------------------------------------------------------------------------------------------------------------------------------------------------------------------------------------------------------------------------------------------------------------------------------------------------------------|
| TEVp   |  | M EQKLISEEDL GESLFKGRDYNPISSSTICHLTNE SDGHTTSLYIGIGFGFFIITNKHLFRNNGTLLVQSLHG VFKVNTTTLQOHLIDGRD M I I RMPKDFPPFPQKLFRE PQRERICLV TTNFQTKSMSMVDTSCTFPSSDGI FWKHWIQTKDQC GCSPLVSTRDGFIVGIHSASNF TTNNTNYFTS VPKNF MELLTNQEAQQVSGWRLNADSVLWGGHKVFMSKPEEPFPVKEATQLMSELVYSQYPYDVPDYA<br>Dark blue: Myc tag; Black: TEVp |
| PPVp   |  | MSKSLFRGLRDYNP IASSICQLNNSGARQSEMFLGFGGLIVTNQHLFKRNDGELTIRSHHGFEVVKDTKTKLLPCKGRDIVI IRLPKDFPPFPK RLQFRTPPTTEDRVCLIGSNFQTKSISSTMSSETSATYPVDNSHFWKHWISTKDGHCGLP IVSTRDGSILGLHSLANSTNTQNFYAAFDPNFETTYLSN QDNDNWKQWRYNPDEV CWSGLQKLRDIPQSPFTICKLLTDL DGEFVYTQ<br>Black: PPVp                                          |
| SbMVp  |  | MSKSVYKGLRDYSGISTLICQLTNSSDGHKETFMGVGYGSFIITNGHLFRNNGMLTVKTHGFEVVIHNTTQLKIHFIQGRDIVI IRLPKDFPPFPK RNLFRQPKREERVMVGTNFQEKSLRATVSESSMILPEGKGSFWIHWITTDGFCGLPLVSVNDGHIVGIGHLTSNDSEKNFFVPLTDGFEKEYLEN ADNLSWDKHHWFEP SKIAWGLNLVEEQPEEFKISKLVSDLFGNTVTVQ YPYDVPDYA<br>Dark blue: HA tag; Black: SbMVp                  |
| SuMMVp |  | MGVSLSRGVRDYNAISSMVCVTVNDSSSSTMYGIGYCYIITNKHLFRNNGRLITSHHGEYICKNSASLKL SLPGRDMLLIRLPKDCPPFPK KLFKREPTSEEKAVLVVTFQEKHLSSMVSESSCVVQREDSPIWRHWISTKDGHCGAP IVSIRDGYIIGSHCGENPMTSNFTSIPKDFQNLNGKE ANEWSGKWNIDAVCWGGLSVNDAPSEPFITAKVVSALDTEGIVKQ YPYDVPDYA<br>Dark blue: HA tag; Black: SuMMVp                          |

### Inducible split proteases

|                |                                                                                     |                                                                                                                                                                                                                                                                                                                                                                                                                                                                                                                  |
|----------------|-------------------------------------------------------------------------------------|------------------------------------------------------------------------------------------------------------------------------------------------------------------------------------------------------------------------------------------------------------------------------------------------------------------------------------------------------------------------------------------------------------------------------------------------------------------------------------------------------------------|
| FRB_nTEVp      |    | M EQKLISEEDL ILWHEMWHEGLEEARSLYFGERNVKGMEVLEPLHAMMERGPQTLKETSFNQAYGRDLMEAEQEWCRKYMKSGNVKDLLQAWDL Y YHVFRRISK GSGS GESLFKGRDYNPISSSTICHLTNE SDGHTTSLYIGIGFGFFIITNKHLFRNNGTLLVQSLHG VFKVNTTTLQOHLIDGRD M I I RMPKDFPPFPQKLFRE PQRERICLV TTNFQTKSMSMVDTSCTFPSSDGI FWKHWIQTKDQC GCSPLVSTRDGFIVGIHSASNF TTNNTNYFTS VPKNF MELLTNQEAQQVSGWRLNADSVLWGGHKVFMSKPEEPFPVKEATQLMSELVYSQ<br>Dark blue: Myc tag; Black: FRB; Magenta: nTEVp                                                                                     |
| FKBP_cTEVp     |    | M GVQVETISP GDGRTPFKRGQTCVHYTGMLDGGKFDSSRDRNPKPFKMLGKQEVIRGWEEGAQMSVQRAKLTISPDIYAGATGHPGIIPPHA TLVFDVLLKLE GSG KSMSSMVDTSCTFPSSDGI FWKHWIQTKDQC GCSPLVSTRDGFIVGIHSASNF TTNNTNYFTS VPKNF MELLTNQEAQQVSGWRLNADSVLWGGHKVFMSKPEEPFPVKEATQLMSELVYSQ<br>Black: FKBP; Magenta: cTEVp;                                                                                                                                                                                                                                   |
| PYL1_nTEVp     |   | M DTYRYI GGGAPTQDEFTQLSQAIEFHTYQLNGRCSSLLAQRIHAPPETVWSVVRFRDPQIYKHFIKSCNVSEDFEMRVGCTRDVNVISGL PANTSRERLDLLDDRRVTGFSITGGEHRLRNYKSVTTVHRFEKEEEEEERIWTVVLESYVVDVPEGNSEEDTRLFADTVIRLNLQKLASITEAMN G SSGS GESLFKGRDYNPISSSTICHLTNE SDGHTTSLYIGIGFGFFIITNKHLFRNNGTLLVQSLHG VFKVNTTTLQOHLIDGRD M I I RMPKDFP PFPQKLFRE PQRERICLV TTNFQTKSMSMVDTSCTFPSSDGI FWKHWIQTKDQC GCSPLVSTRDGFIVGIHSASNF TTNNTNYFTS VPKNF MELLTNQEAQQVSGWRLNADSVLWGGHKVFMSKPEEPFPVKEATQLMSELVYSQ<br>Dark blue: AU1 tag Black: PYL1; Magenta: nTEVp |
| ABI_cTEVp      |  | M EQKLISEEDL TRVPLYGFTSICGRPEMEAAVSTIPRFLQSSSGSMLDGRFDPQSAAHFFGVYDGHGGSQVANYCRERMHLALAEIEAKEK PML CDGDTWLEKWKALFNSFLRVDSEIESVAPETVGSTSVVAVVFP SHIFVANCDSRAVLCRGKTALPLSVDHKPDREDEAARIEAAGGKVIQWNGAR VFGVLAMRSRIGDRYLKPSIIPDPEVTAVKRVKEDDCLILASDGVWDMTDEEACEMARKRILLWHKKNVAGDASLLADERRKEGKDPAAMSAAEY LSKLAIQRGSKDNISVVVDLK GSGS KSMSSMVDTSCTFPSSDGI FWKHWIQTKDQC GCSPLVSTRDGFIVGIHSASNF TTNNTNYFTS VPKNF MELLTNQEAQQVSGWRLNADSVLWGGHKVFMSKPEEPFPVKEATQLMSELVYSQ<br>Dark blue: Myc tag; Black: ABI; Magenta: cTEVp  |
| FRB_nPPVp      |  | M EQKLISEEDL ILWHEMWHEGLEEARSLYFGERNVKGMEVLEPLHAMMERGPQTLKETSFNQAYGRDLMEAEQEWCRKYMKSGNVKDLLQAWDL Y YHVFRRISK GSGS SKSLFRGLRDYNP IASSICQLNNSGARQSEMFLGFGGLIVTNQHLFKRNDGELTIRSHHGFEVVKDTKTKLLPCKGRDI VIIRLPKDFPPFPKRLQFRTPPTTEDRVCLIGSNFQT<br>Dark blue: Myc tag; Black: FRB; Cyan: nPPVp                                                                                                                                                                                                                          |
| FKBP_cPPVp     |  | M GVQVETISP GDGRTPFKRGQTCVHYTGMLDGGKFDSSRDRNPKPFKMLGKQEVIRGWEEGAQMSVQRAKLTISPDIYAGATGHPGIIPPHA TLVFDVLLKLE GSG SKSISSTMSSETSATYPVDNSHFWKHWISTKDGHCGLP IVSTRDGSILGLHSLANSTNTQNFYAAFDPNFETTYLSNQDND NWIKQWRYNPDEV CWSGLQKLRDIPQSPFTICKLLTDL DGEFVYTQ DTYRYI<br>Black: FKBP; Cyan: cPPVp Dark blue: AU1 tag                                                                                                                                                                                                         |
| PYL1_nPPVp     |  | M DTYRYI GGGAPTQDEFTQLSQAIEFHTYQLNGRCSSLLAQRIHAPPETVWSVVRFRDPQIYKHFIKSCNVSEDFEMRVGCTRDVNVISGLP ANTSRERLDLLDDRRVTGFSITGGEHRLRNYKSVTTVHRFEKEEEEEERIWTVVLESYVVDVPEGNSEEDTRLFADTVIRLNLQKLASITEAMN GS SSS KSLFRGLRDYNP IASSICQLNNSGARQSEMFLGFGGLIVTNQHLFKRNDGELTIRSHHGFEVVKDTKTKLLPCKGRDIVI IRLPKDFPP PPKRLQFRTPPTTEDRVCLIGSNFQT<br>Dark blue: AU1 tag Black: PYL1; Cyan: nPPVp                                                                                                                                       |
| ABI_cPPVp      |  | M EQKLISEEDL TRVPLYGFTSICGRPEMEAAVSTIPRFLQSSSGSMLDGRFDPQSAAHFFGVYDGHGGSQVANYCRERMHLALAEIEAKEK PML CDGDTWLEKWKALFNSFLRVDSEIESVAPETVGSTSVVAVVFP SHIFVANCDSRAVLCRGKTALPLSVDHKPDREDEAARIEAAGGKVIQWNGAR VFGVLAMRSRIGDRYLKPSIIPDPEVTAVKRVKEDDCLILASDGVWDMTDEEACEMARKRILLWHKKNVAGDASLLADERRKEGKDPAAMSAAEY LSKLAIQRGSKDNISVVVDLK GSGS SKSISSTMSSETSATYPVDNSHFWKHWISTKDGHCGLP IVSTRDGSILGLHSLANSTNTQNFYAAFDPNFETTYLSNQDND NWIKQWRYNPDEV CWSGLQKLRDIPQSPFTICKLLTDL DGEFVYTQ<br>Dark blue: Myc tag; Black: ABI; Cyan: cPPVp |
| FRB_nSbMVp     |  | M EQKLISEEDL ILWHEMWHEGLEEARSLYFGERNVKGMEVLEPLHAMMERGPQTLKETSFNQAYGRDLMEAEQEWCRKYMKSGNVKDLLQAWDL Y YHVFRRISK GSGS SKSVYKGLRDYSGISTLICQLTNSSDGHKETFMGVGYGSFIITNGHLFRNNGMLTVKTHGFEVVIHNTTQLKIHFIQGRD VILIRMPKDFPPFPKRLFRQPKREERVMVGTNFQEKSLRATVSESSMILPEGKGSFWIHWITTDGFCGLPLVSVNDGHIVGIGHLTSNDSEKNFFVPLTDGFEKEYLEN ADNLSWDKHHWFEP SKIAWGLNLVEEQPEEFKISKLVSDLFGNTVTVQ YPYDVPDYA<br>Dark blue: Myc tag; Black: FRB; Red: nSbMVc                                                                                      |
| FKBP_cSbMVp_HA |  | M GVQVETISP GDGRTPFKRGQTCVHYTGMLDGGKFDSSRDRNPKPFKMLGKQEVIRGWEEGAQMSVQRAKLTISPDIYAGATGHPGIIPPHA                                                                                                                                                                                                                                                                                                                                                                                                                   |





GLPKGVALPHRTACVRFSHARDPIFGNQIIP AEYCLSYETEILTVEYGLLPIGKIVEKRIECTVYSVDNNGNIYTQPVAQWHDRGEQEVFEYCLEL  
 GSLIRATKDHKFMVTDGQMLPIDEIFERELDLMRVDNLPN GGIKIAVNSACKNWFSSLSHFVIHLNSHGFPPEVEEQAGTLPMSCAQESGMDRHPA  
 ACASARINV  
 Dark blue: His tag; Green: IntN; Black: cLuc; Red: SbMVs cleavage site; Black: nLuc; Green: Cint

CycLuc\_SuMMVs

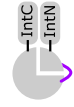

M HHHHHH M IKIATRKYLGKQNVYDIGVERDHNFKNGFIASNCFN DTTRYIDTAILSVVFFHHGFMFTTLGYLICGFRVVLMYRFEELFL  
 RSLQDYKIQSALLVPTLFSFFAKSTLIDKYDLSNLHEIASGGAPLSKEVGEAVAKRFHLPGRQGYGLTETTSAILITPEGDDKPGAVGKVVFFFEA  
 KVVLDLTGKTLGVNQRGELCVRGPMIMSGYVNNPEATNALIDKDGWLHSGDIAYWDEDEHFFIVDRLKSLIKYKGYQVAPAELESILLQHPNIFDAG  
 VAGLPDDDAGELPAAVVLEHGKMTTEKEIVDYVASQVTTAKKLRGGVVVFDEVPKGLTGKLDARKIREILIKAKK GS **EEIHLQS** GSG AKNIK  
 KGPAPFYPLEDTAGEQLHKAMKRYALVPGTIAFTDAHIEVDITYAEYFEMSVRLAEAMKRYGLNTHRIVVCSSENSLQFFMPVLGALFIGVAVAPA  
 NDIYNERELLSMGISQPTVVVSKKGLQKILNVQKPLPIQKI IIMDSKTDYQGFQSMYTFVTSHLPPGFNEYDFVPESFDRDKTIALIMNSSGST  
 GLPKGVALPHRTACVRFSHARDPIFGNQIIP AEYCLSYETEILTVEYGLLPIGKIVEKRIECTVYSVDNNGNIYTQPVAQWHDRGEQEVFEYCLEL  
 GSLIRATKDHKFMVTDGQMLPIDEIFERELDLMRVDNLPN GGIKIAVNSACKNWFSSLSHFVIHLNSHGFPPEVEEQAGTLPMSCAQESGMDRHPA  
 ACASARINV  
 Dark blue: His-tag; Green: IntN; Black: cLuc; Purple: SuMMVs cleavage site; Black: nLuc; Green: Cint

SPOC logic building modules

P3\_cLuc

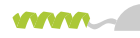

M SPEDEIQQLLEEEIAQLEQKNAALKEKNQALKY GSGSGSGSGG STMTEKEIVDYVASQVTTAKKLRGGVVVFDEVPKGLTGKLDARKIREILIK  
 AKKGGKIAVNSGSG YPYDVPDYA  
 Green: P3; Black: cLuc; Dark blue: HA-tag

P3\_PPVs\_cLuc

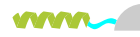

M SPEDEIQQLLEEEIAQLEQKNAALKEKNQALKY GSGSGGS **NVVVHQA** GSGSG STMTEKEIVDYVASQVTTAKKLRGGVVVFDEVPKGLTGKLD  
 DARKIREILIKAKKGGKIAVNSGSG YPYDVPDYA  
 Green: P3; Cyan: PPVs cleavage site; Black: cLuc; Dark blue: HA-tag

nLuc\_AP4

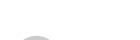

M EQKLISEEDL GSG EDANKIKKGPAPFYPLEDTAGEQLHKAMKRYALVPGTIAFTDAHIEVDITYAEYFEMSVRLAEAMKRYGLNTHRIVVCS  
 SENSLOFFMPVLGALFIGVAVAPANDIYNERELLSMGISQPTVVVSKKGLQKILNVQKPLPIQKI IIMDSKTDYQGFQSMYTFVTSHLPPGFNEYDFV  
 YDFVPESFDRDKTIALIMNSSGSTGLPKGVALPHRTACVRFSHARDPIFGNQIIPDTAILS SVVFFHHGFMFTTLGYLICGFRVVLMYRFEELFLR  
 SLQDYKIQSALLVPTLFSFFAKSTLIDKYDLSNLHEIASGGAPLSKEVGEAVAKRFHLPGRQGYGLTETTSAILITPEGDDKPGAVGKVVFFFEAK  
 VVDLDTGKTLGVNQRGELCVRGPMIMSGYVNNPEATNALIDKDGWLHSGDIAYWDEDEHFFIVDRLKSLIKYKGYQVAPAELESILLQHPNIFDAGV  
 AGLPDDDAGELPAAVVLEHGK GSGSGSGSGS **SPEDELAANEELQONEQKLAQIKQLQAIKYG**  
 Dark blue: Myc-tag; Black: nLuc; Green: AP4

nLuc\_TEVs\_AP4

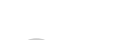

M EQKLISEEDL EDANKIKKGPAPFYPLEDTAGEQLHKAMKRYALVPGTIAFTDAHIEVDITYAEYFEMSVRLAEAMKRYGLNTHRIVVCSSENS  
 LQFFMPVLGALFIGVAVAPANDIYNERELLSMGISQPTVVVSKKGLQKILNVQKPLPIQKI IIMDSKTDYQGFQSMYTFVTSHLPPGFNEYDFV  
 PESFDRDKTIALIMNSSGSTGLPKGVALPHRTACVRFSHARDPIFGNQIIPDTAILS SVVFFHHGFMFTTLGYLICGFRVVLMYRFEELFLRSLQD  
 YKIQSALLVPTLFSFFAKSTLIDKYDLSNLHEIASGGAPLSKEVGEAVAKRFHLPGRQGYGLTETTSAILITPEGDDKPGAVGKVVFFFEAKVVDL  
 DTGKTLGVNQRGELCVRGPMIMSGYVNNPEATNALIDKDGWLHSGDIAYWDEDEHFFIVDRLKSLIKYKGYQVAPAELESILLQHPNIFDAGVAGLP  
 DDDAGELPAAVVLEHGK GSGSGS **ENLYFQS** GSGSGS **SPEDELAANEELQONEQKLAQIKQLQAIKYG**  
 Dark blue: Myc-tag; Black: nLuc; Magenta: TEVs cleavage site; Green: AP4

AP4mS\_PPVs\_P3\_TEVs\_cLuc

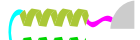

M SPEDELQSNEEELQONEQKQLQKIKQKLSIKY GSGSGG **NVVVHQA** GSGSGS **SPEDEIQQLLEEEIAQLEQKNAALKEKNQALKY** GRSGA  
 S **ENLYFQS** GSGSG STMTEKEIVDYVASQVTTAKKLRGGVVVFDEVPKGLTGKLDARKIREILIKAKKGGKIAVNSGSG YPYDVPDYA  
 Green: AP4mS; Cyan: PPVs cleavage site; Green: P3; Magenta: TEVs cleavage site; Black: cLuc; Dark blue: HA tag

AP4mS\_PPVs\_P3\_cLuc

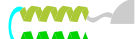

M SPEDELQSNEEELQONEQKQLQKIKQKLSIKY GSGSGG **NVVVHQA** GSGSGS **SPEDEIQQLLEEEIAQLEQKNAALKEKNQALKY** GSGSG  
 GSGSGSTMTEKEIVDYVASQVTTAKKLRGGVVVFDEVPKGLTGKLDARKIREILIKAKKGGKIAVNSGSG YPYDVPDYA  
 Green: AP4mS; Cyan: PPVs cleavage site; Green: P3; Black: cLuc; Dark blue: HA tag

nLuc\_AP4\_TEVs\_P3mS

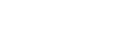

M EQKLISEEDL GSG EDANKIKKGPAPFYPLEDTAGEQLHKAMKRYALVPGTIAFTDAHIEVDITYAEYFEMSVRLAEAMKRYGLNTHRIVVCS  
 SENSLOFFMPVLGALFIGVAVAPANDIYNERELLSMGISQPTVVVSKKGLQKILNVQKPLPIQKI IIMDSKTDYQGFQSMYTFVTSHLPPGFNEYDFV  
 YDFVPESFDRDKTIALIMNSSGSTGLPKGVALPHRTACVRFSHARDPIFGNQIIPDTAILS SVVFFHHGFMFTTLGYLICGFRVVLMYRFEELFLR  
 SLQDYKIQSALLVPTLFSFFAKSTLIDKYDLSNLHEIASGGAPLSKEVGEAVAKRFHLPGRQGYGLTETTSAILITPEGDDKPGAVGKVVFFFEAK  
 VVDLDTGKTLGVNQRGELCVRGPMIMSGYVNNPEATNALIDKDGWLHSGDIAYWDEDEHFFIVDRLKSLIKYKGYQVAPAELESILLQHPNIFDAGV  
 AGLPDDDAGELPAAVVLEHGK GSGSGSGSGS **SPEDELAANEELQONEQKLAQIKQLQAIKYG** GSGSGG **ENLYFQS** GSGSGS **SPEDEIQ**  
**QLEEEISQLEQKNSQLKEKNQQLKYG**  
 Dark blue: Myc tag; Black: nLuc; Green: AP4; Magenta: TEVs cleavage site; Green: P3mS

nLuc\_AP4\_PPVs\_P3mS



M EQKLISEEDL GSG EDANKIKKGPAPFYPLEDTAGEQLHKAMKRYALVPGTIAFTDAHIEVDITYAEYFEMSVRLAEAMKRYGLNTHRIVVCS  
 SENSLOFFMPVLGALFIGVAVAPANDIYNERELLSMGISQPTVVVSKKGLQKILNVQKPLPIQKI IIMDSKTDYQGFQSMYTFVTSHLPPGFNEYDFV  
 YDFVPESFDRDKTIALIMNSSGSTGLPKGVALPHRTACVRFSHARDPIFGNQIIPDTAILS SVVFFHHGFMFTTLGYLICGFRVVLMYRFEELFLR  
 SLQDYKIQSALLVPTLFSFFAKSTLIDKYDLSNLHEIASGGAPLSKEVGEAVAKRFHLPGRQGYGLTETTSAILITPEGDDKPGAVGKVVFFFEAK  
 VVDLDTGKTLGVNQRGELCVRGPMIMSGYVNNPEATNALIDKDGWLHSGDIAYWDEDEHFFIVDRLKSLIKYKGYQVAPAELESILLQHPNIFDAGV  
 AGLPDDDAGELPAAVVLEHGK GSGSGSGSGS **SPEDKLAQIKEKLQIQKEELANEKQLQANKY** GSGSGS **NVVVHQA** GSGSGS **SPEDENA**  
**QLEQNAQLKQEQISQLEQEQISQLEW**  
 Dark blue: Myc tag; Black: nLuc; Green: AP4; Cyan: PPVs cleavage site; Green: P3mS

nLuc\_AP4\_PPVs\_TEVs\_P3mS

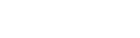

M EQKLISEEDL GSG EDANKIKKGPAPFYPLEDTAGEQLHKAMKRYALVPGTIAFTDAHIEVDITYAEYFEMSVRLAEAMKRYGLNTHRIVVCS  
 SENSLOFFMPVLGALFIGVAVAPANDIYNERELLSMGISQPTVVVSKKGLQKILNVQKPLPIQKI IIMDSKTDYQGFQSMYTFVTSHLPPGFNEYDFV  
 YDFVPESFDRDKTIALIMNSSGSTGLPKGVALPHRTACVRFSHARDPIFGNQIIPDTAILS SVVFFHHGFMFTTLGYLICGFRVVLMYRFEELFLR  
 SLQDYKIQSALLVPTLFSFFAKSTLIDKYDLSNLHEIASGGAPLSKEVGEAVAKRFHLPGRQGYGLTETTSAILITPEGDDKPGAVGKVVFFFEAK  
 VVDLDTGKTLGVNQRGELCVRGPMIMSGYVNNPEATNALIDKDGWLHSGDIAYWDEDEHFFIVDRLKSLIKYKGYQVAPAELESILLQHPNIFDAGV  
 AGLPDDDAGELPAAVVLEHGK GSGSGSGSGS **SPEDKLAQIKEKLQIQKEELANEKQLQANKY** GS **NVVVHQA** G **ENLYFQS** GS **SPEDE**  
**IQQLEEEISQLEQKNSQLKEKNQQLKYG**  
 Myc tag; Black: nLuc; Green: AP4; Cyan: PPVs cleavage site; Magenta: TEVs cleavage site; Green: P3mS

P9\_cLuc

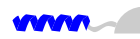

M **SPEDENQALEQKNAQLKQEQIAALEQEQIAQLEYG** GSGSGSGSGG STMTEKEIVDYVASQVTTAKKLRGGVVVFDEVPKGLTGKLDARKIREILIK  
 AKKGGKIAVNSGSG YPYDVPDYA  
 Blue: P9; Black: cLuc; Dark blue: HA tag

P9\_TEVs\_cLuc



## Supplementary Figures

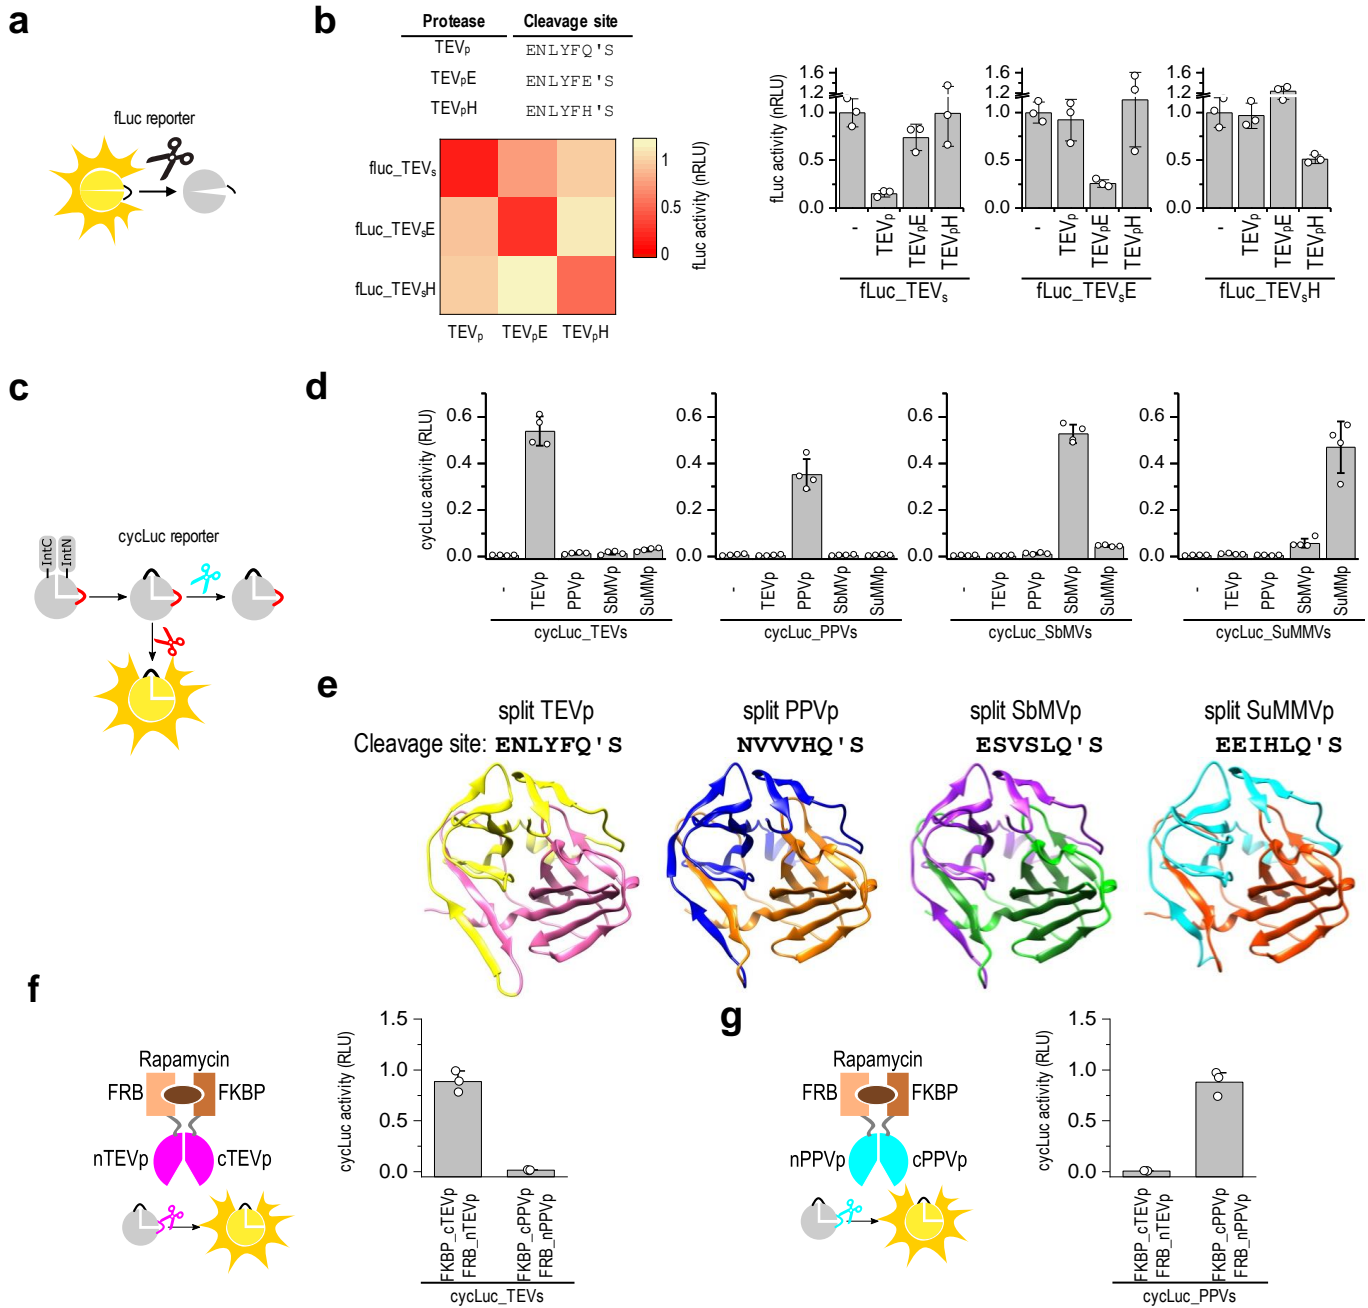

### Supplementary Figure 1. Design and orthogonality of split potyviral proteases.

(a) Schematic presentation of the cleavable firefly luciferase (fLuc) inverse reporter. The cleavable fLuc reporter is deactivated by proteolysis. (b) Recognition sequences for the wild-type tobacco etch virus protease (TEV<sub>p</sub>) and its variants, as well as orthogonality of TEV<sub>p</sub> variants with modified cleavage sites. Reduced luciferase activity was detected in the presence of a protease and the cleavable fLuc reporter containing the appropriate protease cleavage site. Heat map showing orthogonality of the TEV<sub>p</sub> variants. Dark red corresponds to lower luciferase activity as a measure of higher protease activity. (c) Schematic presentation of the cyclic firefly luciferase reporter (cycLuc). CycLuc is cyclized by intein excision and

activated by proteolysis. **(d)** Orthogonality of four potyviral protease homologues detected by the cyclic luciferase reporter with matching protease cleavage site. **(e)** Three-dimensional homology models of orthogonal split proteases from the Potyviridae family reconstituted in the active form (using the TEVp crystal structure from PDB 1LVB): nTEVp (residues 1–118 in magenta) and cTEVp (residues 119–242 in yellow), N-plum pox virus protease (nPPVp; residues 1–118 in orange) and cPPVp (residues 119–242 in blue), N-soybean mosaic virus protease (nSbMVp; residues 1–118 in green) and cSbMVp (residues 119–242 in violet), and N-sunflower mild mosaic virus (nSuMMVp; residues 1–118 in orange) and cSuMMVp (residues 119–242 in cyan). **(f)** Orthogonality of split TEVp and PPVp tested on cycLuc reporter with TEVp cleavage site. **(g)** Orthogonality of split TEVp and PPVp tested on cycLuc reporter with PPVp cleavage site. Transfection mixtures are listed in **Supplementary Table 1** and **Supplementary Table 3**. Values are the means of three (**b,f,g**) and four (**d**) cell cultures  $\pm$  s.d. and are representative of two independent experiments.

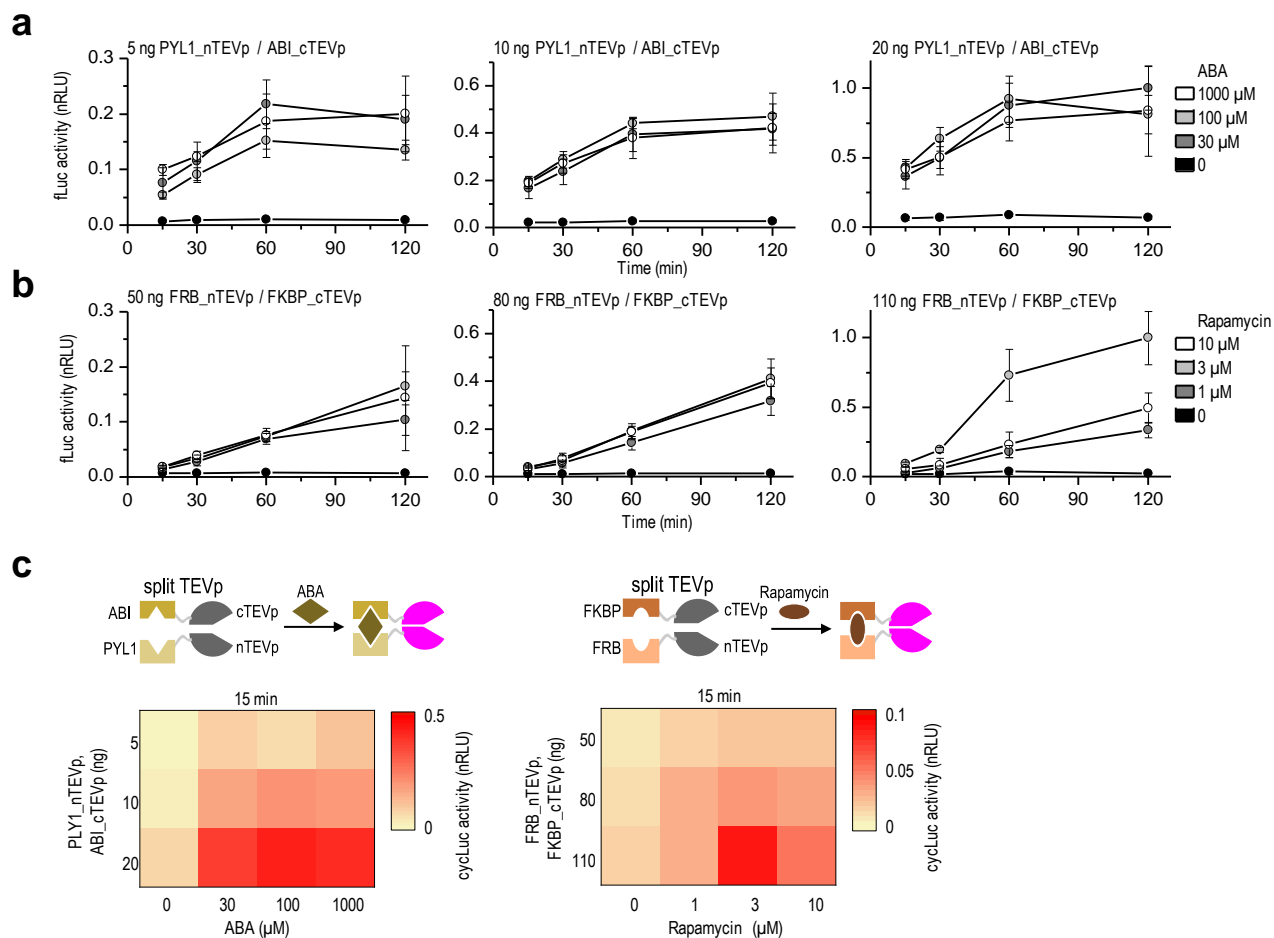

**Supplementary Figure 2. Chemical regulation of the reconstitution of split potyviral proteases.**

(a) Kinetics of split TEVp reconstitution based on the abscisic acid (ABA) dimerization system. (b) Kinetics of split TEVp reconstitution based on the rapamycin dimerization system. (c) Heat map showing ABA (left) and rapamycin (right) dependent reconstitution of split TEVp 15 minutes after induction. Dark red corresponds to higher luciferase activity as a measure of higher protease activity. Transfection mixtures are listed in **Supplementary Table 1**. Values are the means of four cell cultures  $\pm$  s.d. and are representative of two independent experiments.

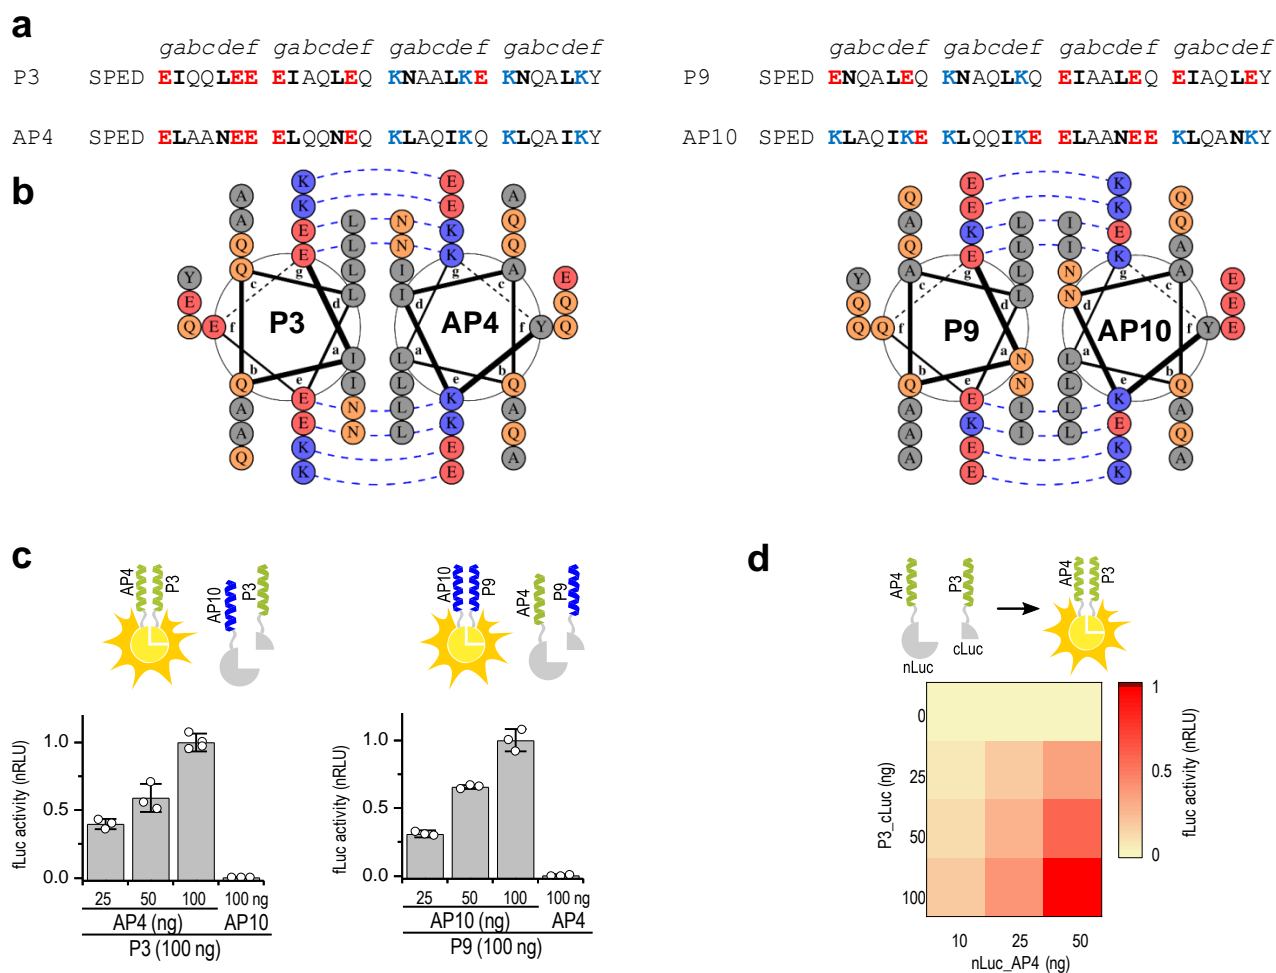

### Supplementary Figure 3. Design of antiparallel coiled-coil (CC) pairs.

(a) Amino acid sequences of CC peptides in heptad repeats register. Acidic residues and basic residues are represented in red and blue respectively. (b) Helical projection representing specific CC interactions in antiparallel orientation (salt bridges between residues *g* and *g'* and *e* and *e'* are shown with dotted lines). Acidic residues and basic residues are represented in red and blue respectively, hydrophobic residues in grey and asparagine and glutamine residues in orange. The helical wheels projections were drawn in DrawCoil 1.0. (c) CC orthogonality and split luciferase reconstitution by antiparallel CC dimerization. (d) Split luciferase reconstitution with CC (P3/AP4) across 15 input concentration combinations. Transfection plasmid mixtures are listed in **Supplementary Table 3**. Values are the mean of three cell cultures  $\pm$  s.d. and are representative of two independent experiments.

|       | <i>gabcdef</i> | <i>gabcdef</i>               | <i>gabcdef</i>               | <i>gabcdef</i>               |                              | <i>gabcdef</i> | <i>gabcdef</i> | <i>gabcdef</i>               | <i>gabcdef</i>        |                       |                       |
|-------|----------------|------------------------------|------------------------------|------------------------------|------------------------------|----------------|----------------|------------------------------|-----------------------|-----------------------|-----------------------|
| P3    | SPED           | <b>EIQQL<b>EE</b></b>        | <b>EIAQL<b>EQ</b></b>        | <b>KNAAL<b>KE</b></b>        | <b>KNQAL<b>KY</b></b>        | P9             | SPED           | <b>ENQAL<b>EQ</b></b>        | <b>KNAQL<b>KQ</b></b> | <b>EIAAL<b>EQ</b></b> | <b>EIAQL<b>EY</b></b> |
| P3mS  | SPED           | <b>EIQQL<b>EE</b></b>        | <b>EI<u>S</u>QL<b>EQ</b></b> | <b>KN<u>S</u>QL<b>KE</b></b> | <b>KNQ<u>Q</u>L<b>KY</b></b> | P9mS           | SPED           | <b>EN<u>A</u>QL<b>EQ</b></b> | <b>KNAQL<b>KQ</b></b> | <b>EISQL<b>EQ</b></b> | <b>EISQL<b>EY</b></b> |
| AP4   | SPED           | <b>ELAAN<b>EE</b></b>        | <b>ELQ<b>QNEQ</b></b>        | <b>KLAQI<b>KQ</b></b>        | <b>KLQAI<b>KY</b></b>        | AP10           | SPED           | <b>KLAQI<b>KE</b></b>        | <b>KLQQI<b>KE</b></b> | <b>ELAAN<b>EE</b></b> | <b>KLQAN<b>KY</b></b> |
| AP4mS | SPED           | <b>EL<u>Q</u>S<b>NEE</b></b> | <b>ELQ<b>QNEQ</b></b>        | <b>KL<u>Q</u>QI<b>KQ</b></b> | <b>KLQ<u>S</u>I<b>KY</b></b> |                |                |                              |                       |                       |                       |

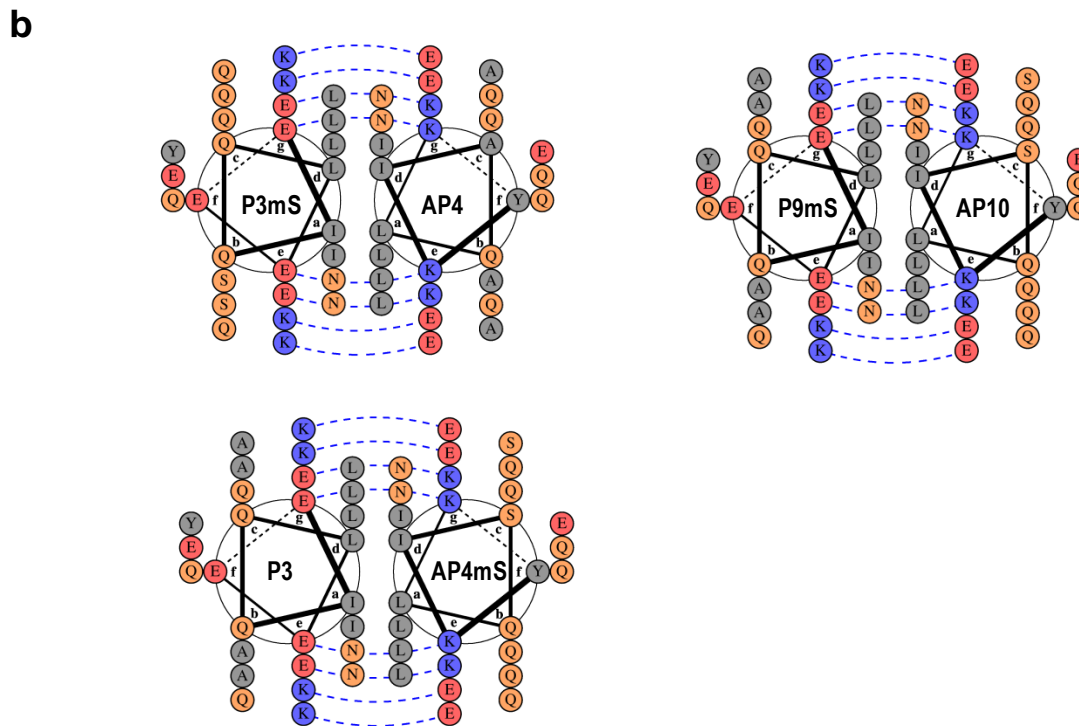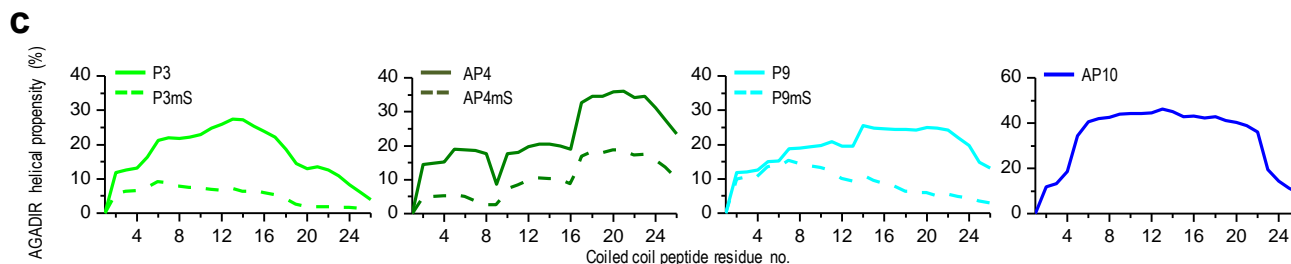

### Supplementary Figure 4. Design of autoinhibitory coiled-coil (CC) pairs.

(a) Amino acid sequences of CC peptides in heptad repeats register. Acidic residues and basic residues are represented in red and blue respectively. Mutations from the original P3, AP4 and P9 sequences are shown in magenta and underlined. (b) Helical projection of destabilized mS CC variants representing specific interactions in antiparallel orientation (salt bridges between residues *g* and *g'* and *e* and *e'* are shown with dotted lines). Acidic residues and basic residues are represented in red and blue respectively, hydrophobic residues in grey and hydrophilic residues (asparagine, glutamine and serine) in orange. The helical wheels projections were drawn in DrawCoil 1.0. (c) Per residue helical propensity calculated with AGADIR. Helicity of original peptides (continuous lines) are compared to the helicity of mS version (dotted lines).



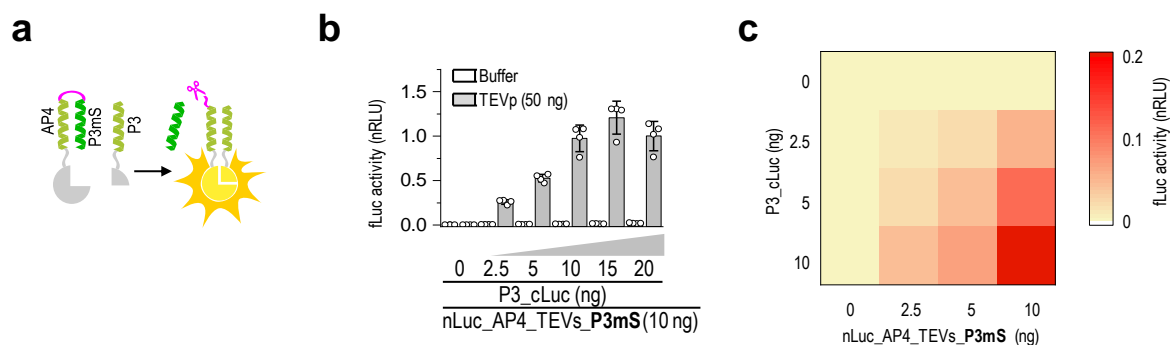

### Supplementary Figure 5. Titration of autoinhibitory and displacer peptides.

(a) Schematic representation of the SPOC building module used for titration of autoinhibitory and displacer peptides. (b) Luciferase reconstitution from the autoinhibited module in presence or absence of TEVp with varying displacer amounts. (c) Heat map showing luciferase reconstitution from the autoinhibited module in presence of TEVp across 16 input concentration combinations. After cleavage of the linker by TEVp, the autoinhibitory coil is replaced by a displacer segment with higher affinity to reconstitute the reporter. Transfection plasmid mixtures are listed in **Supplementary Table 3**. Values (b,c) are the mean of four cell cultures  $\pm$  s.d. and are representative of two independent experiments.

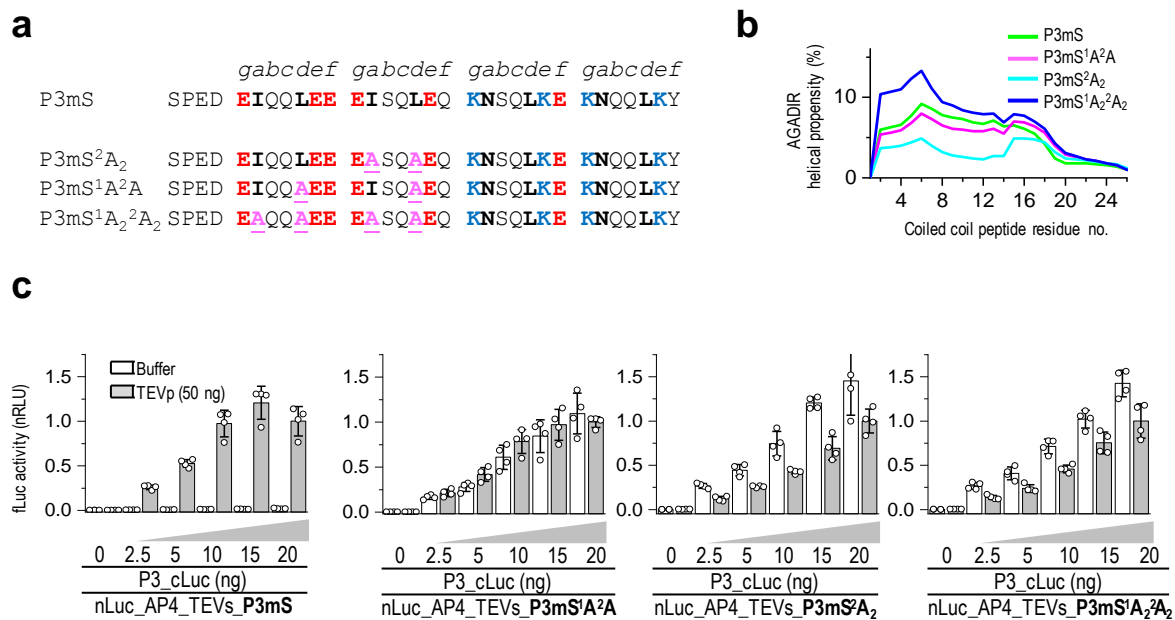

### Supplementary Figure 6. Characterization of destabilized coiled-coil (CC) variants.

(a) Amino acid sequences of P3mS compared to more destabilized versions reported in heptad repeats register. Acidic residues and basic residues are represented in red and blue respectively, mutations from the P3mS sequence are shown in magenta and underlined. (b) Per residue helical propensity for each P3mS version calculated with AGADIR. (c) Titration of luciferase reconstitution from four variants of autoinhibited modules by displacement with peptide P3\_cLuc. Transfection plasmid mixtures are listed in **Supplementary Table 3**. Values are the mean of four cell cultures  $\pm$  s.d. and are representative of two independent experiments.

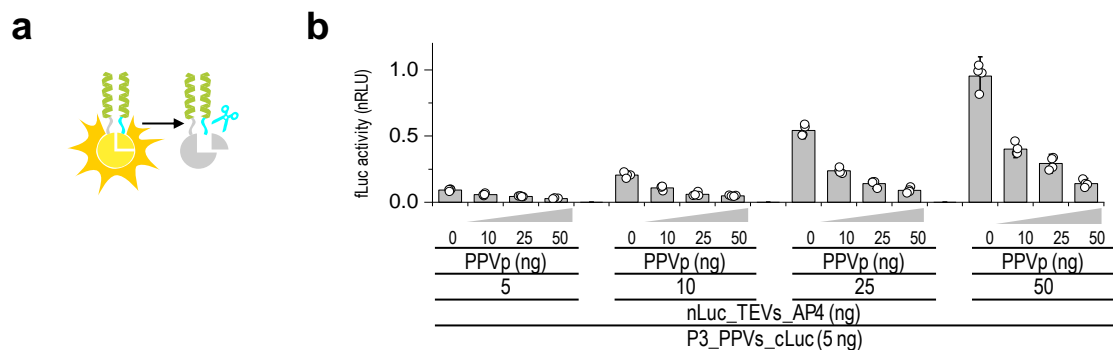

**Supplementary Figure 7. Proteolysis inactivatable SPOC building module.**

(a) Schematic presentation of the inactivatable SPOC building module (negation logic module). (b) Reconstitution of luciferase activity from the negation logic module with varying amounts of complementary fragments and in the presence of varying amounts of PPVp. Transfection plasmid mixtures are listed in **Supplementary Table 3**. Values are the mean of four cell cultures  $\pm$  s.d. and are representative of two independent experiments.

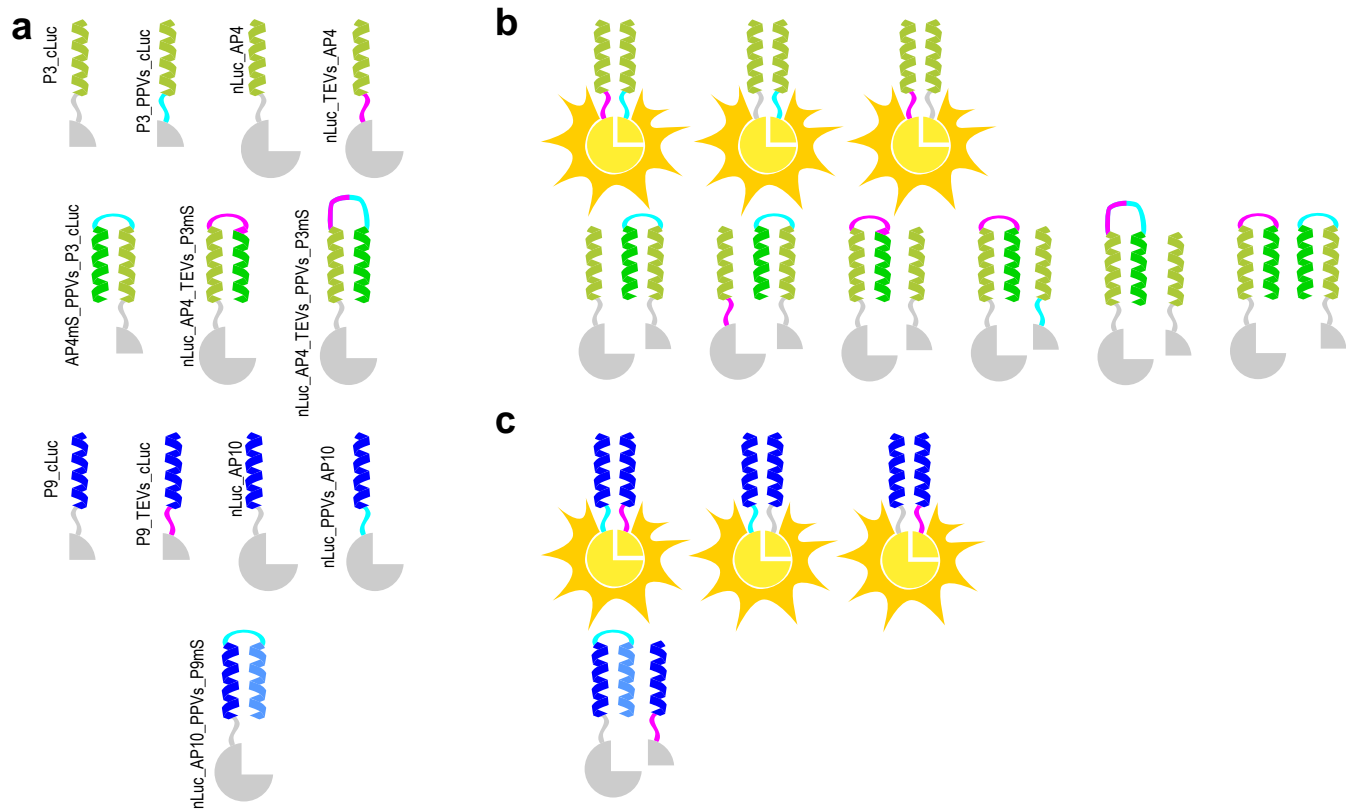

**Supplementary Figure 8. Basic modules for implementation of split proteolysis-based signaling and logic circuits.**

(a) All protease-cleavable orthogonal CC-based (SPOC) interaction modules for luciferase reconstitution used in this study. The cleavage site for plum pox virus protease and tobacco etch virus protease (TEVp) are shown in cyan and magenta respectively, uncleavable linkers and luciferase fragments are shown in grey. Green and blue coils represent the P3/AP4 and P9/AP10 CC pairs, respectively. One or multiple cleavage sites can be located between the CC-forming segments and the reporter fragment or in the linker between the target and an autoinhibitory coil. (b) Pair arrangements of P3/AP4-based modules used in this study for construction of Boolean logic gates. (c) Pair arrangements of P9/AP10-based modules used in this study for construction of Boolean logic gates.

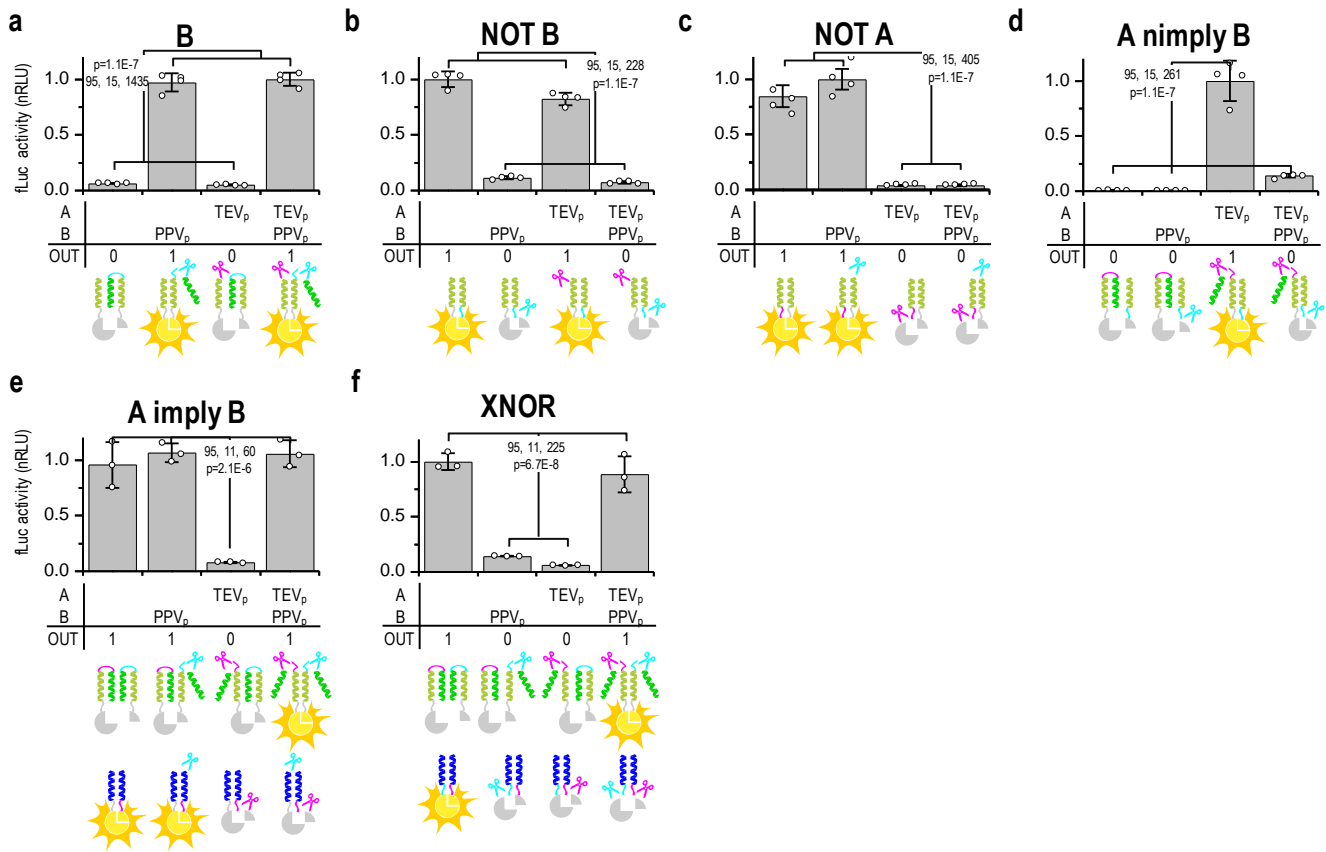

### Supplementary Figure 9. Design of proteolytic cleavage responsive binary logic functions

Combinations of modules resulting in behavior as binary functions B, NOT B, NOT A, A nimply B, A imply B and XOR. Input signals are combinations of two orthogonal proteases, and the output is split luciferase activity. Experiments were performed on HEK293T cells. Transfection plasmid mixtures are listed in **Supplementary Table 2**. Values are the mean of three (e, f, g) and four (a,b,c, d) cell cultures  $\pm$  (s.d.) and are representative of at least two independent experiments, significance tested by 1-way ANOVA with Tukey's comparison (values CI, df, F and p are indicate on graphs).

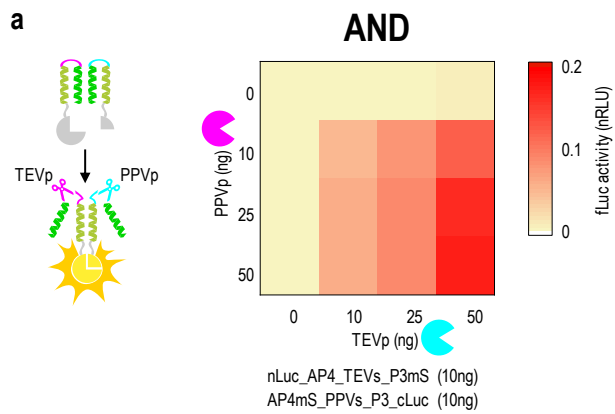

**Supplementary Figure 10. Input protease titration.**

(a) Responses of AND SPOC logic gate across 16 input protease concentration combination. Transfection plasmid mixtures are listed in **Supplementary Table 3**. Values are the mean of four cell cultures and are representative of two independent experiments.

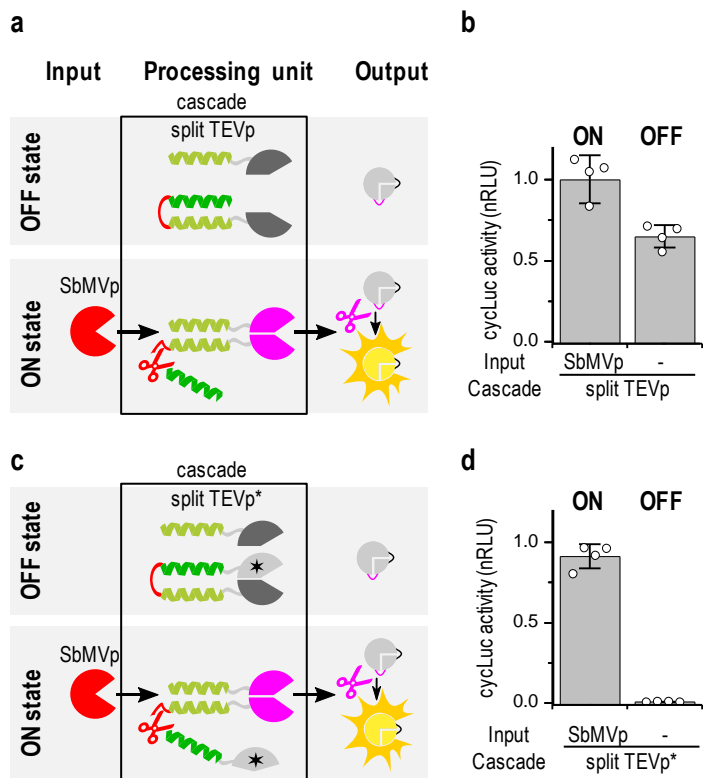

**Supplementary Figure 11. Layered protease cascade inverter.**

(a,c) Schematic presentation of two-layer-protease-cascade function with split TEVp protease inhibited by only an autoinhibitory coil (a) or by an autoinhibitory coil with a catalytically inactive split TEVp\* fragment (c). (b,d) Comparison of two-layer-protease-cascade (b) and of the improved design with a catalytically inactive split TEVp\* fragment (d). Values are the means of four cell cultures  $\pm$  s.d. and are representative of two independent experiments. Transfection mixtures are listed in **Supplementary Table 1**.

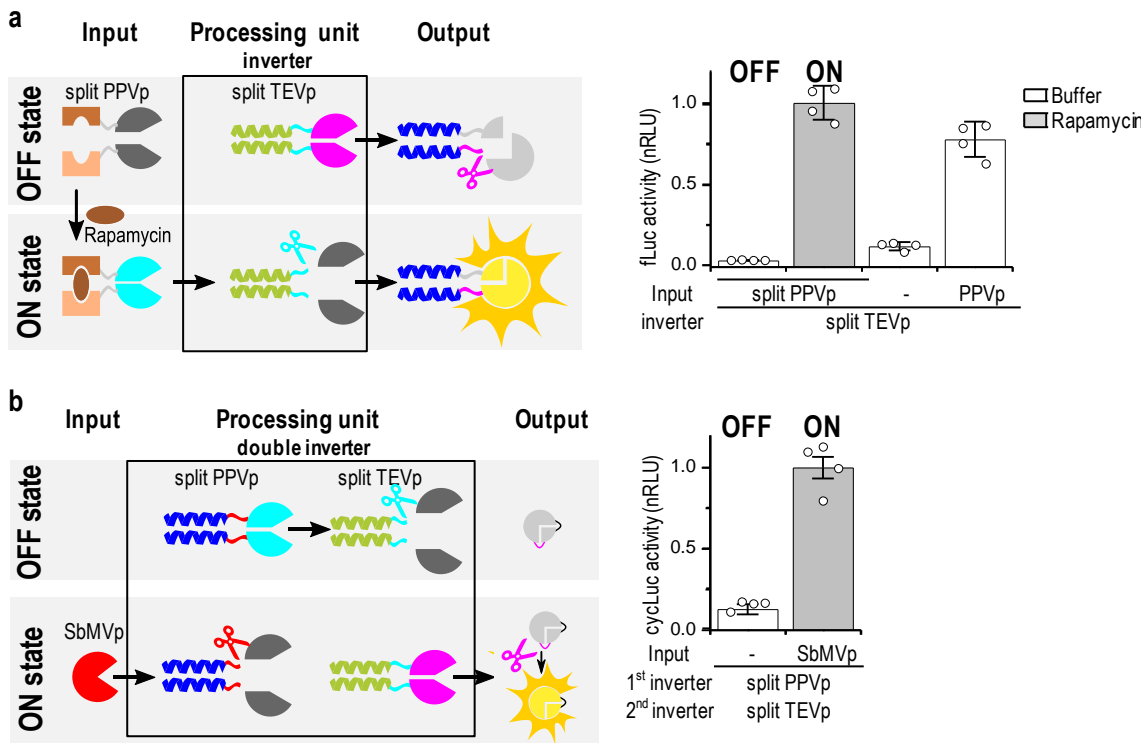

### Supplementary Figure 12. Layered protease cascade inverter.

(a) The proteolytic inverter consisting of the split plum pox virus protease (PPVp) regulated by rapamycin and the split tobacco etch virus protease (TEVp) fused to a P3/P4 pair of parallel coiled-coils (CCs) with a PPVp cleavage site between the CC segments and TEVp fragments. The output of the proteolytic inverter is measured by a negation function (inverse correspondence to TEVp activity). (b) The double proteolytic inverter consist of two inverter layers—a split PPVp fused to a P9/P10 pair of parallel CCs inactivated by the soybean mosaic virus protease (SbMVp) and a split TEVp fused to a P3/P4 CC pair inactivated by PPVp. The output is measured by a cycluc\_TEVs reporter (direct correspondence to TEVp activity). Transfection mixtures are listed in **Supplementary Table 1**. Values are the mean of four cell cultures  $\pm$  s.d. and are representative of at least two independent experiments.



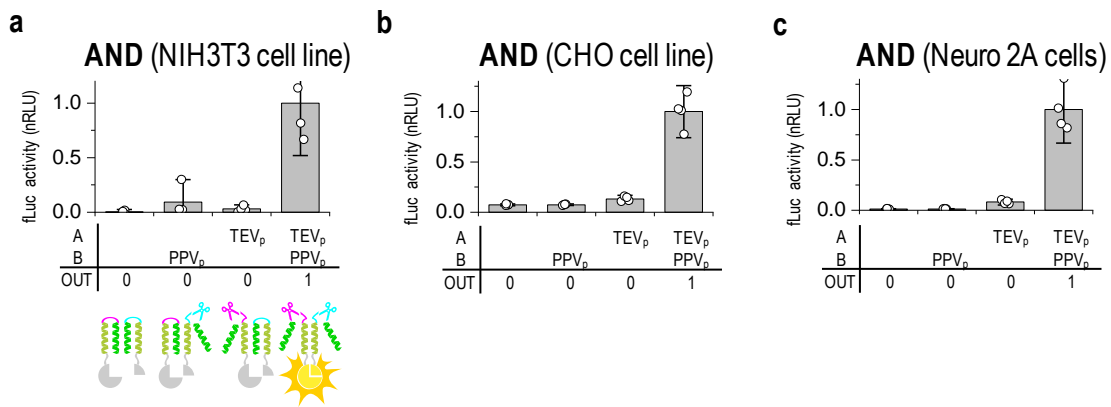

**Supplementary Figure 13. SPOC logic gate AND tested on different cell lines.**

Behavior of AND logic function in NIH3T3 cell line (a), CHO cell line (b) and Neuro2A cells (c). Input signals are combinations of two orthogonal proteases, and the output is split luciferase activity. Transfection plasmid mixtures are listed in **Supplementary Table 4**. Values are the mean of three cell cultures  $\pm$  (s.d.) and are representative of two independent experiments.

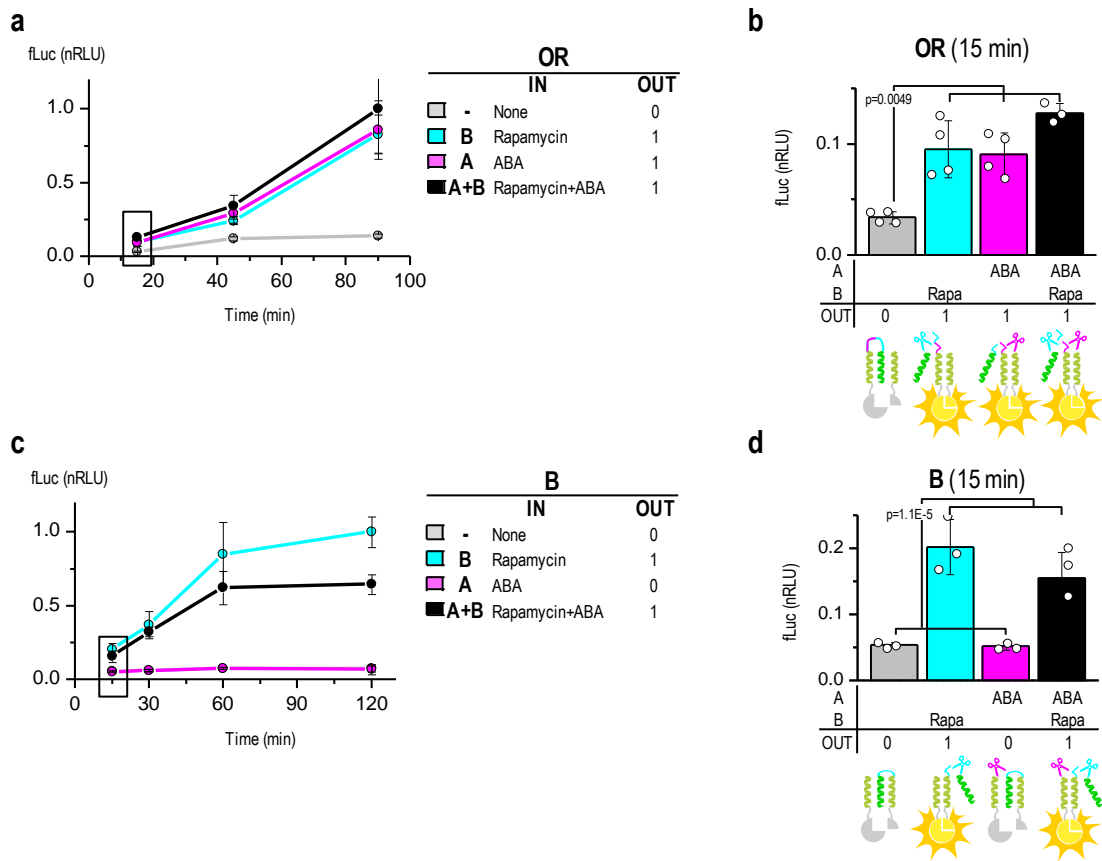

**Supplementary Figure 14. Kinetics of the split protease-cleavable orthogonal CC-based logic (SPOC logic) function OR and B.**

(a) Kinetics of the OR SPOC logic functions at 15–90 min. Only one fragment of split luciferase is proteolytically dependent, but it contains the cleavage sites for both input proteases regulated by rapamycin and abscisic acid (ABA). (b) OR function regulated by rapamycin and ABA 15 minutes after induction. (c) Kinetics of B SPOC logic function from 15–120 min. Only one fragment of split luciferase depends on plum pox virus (PPV) proteolytic cleavage. (d) B function regulated by rapamycin and ABA 15 minutes after induction. Transfection mixtures are listed in **Supplementary Table 5**. Values are the mean of four cell cultures  $\pm$  standard deviation (s.d.) and are representative of two independent experiments, significance tested by 1-way ANOVA with Tukey's comparison (CI 95%, df=15, F=11 (b); CI 95%, df=11, F=66 (d))

**a**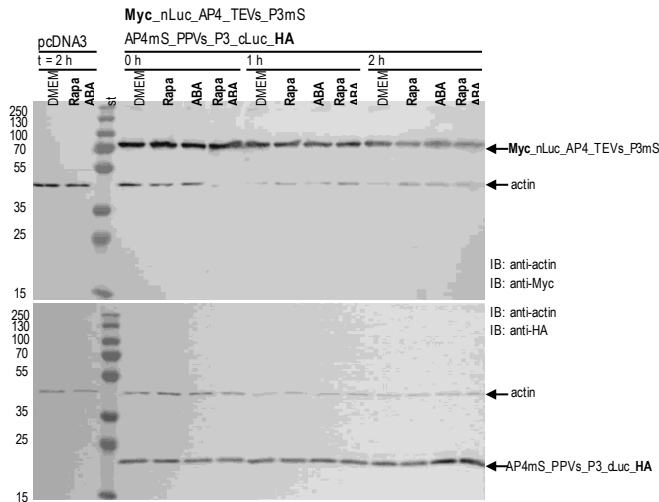**b**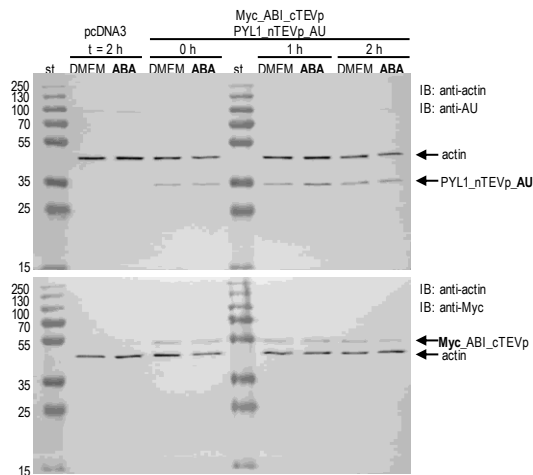**c**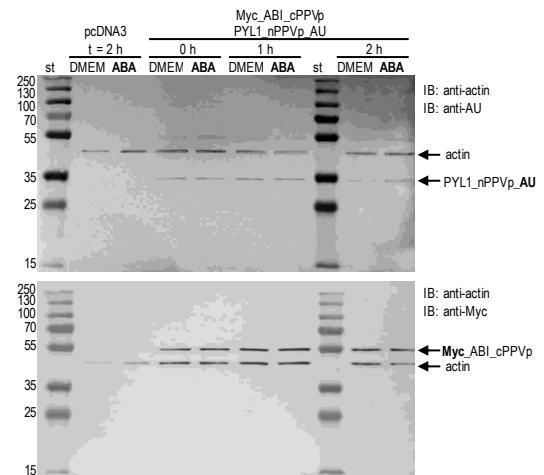

### Supplementary Figure 15. Expression pattern of split proteases and split luciferase reporters.

(a) Plasmids coding for split luciferase reporters were transfected into HEK293T, induced with rapamycin, abscisic acid or both at indicated time points (0, 1 h or 2 h) and their expression was verified by Western blot. An empty plasmid vector (pcDNA3) was transfected as negative control. Bands at approximately 67 kDa corresponds to nLuc\_AP4\_TEVs\_P3mS (Myc tag) and bands at approximately 18 kDa correspond to AP4mS\_PPVs\_P3\_cLuc (HA tag). (b, c) Plasmids coding for split proteases in fusion with abscisic acid dimerizing domains (ABI/PYL1) were transfected into HEK293T, with or without addition of inducer. Cells were lysed at indicated time points (0, 1 h or 2 h) and their expression was verified by Western blot. An empty plasmid vector (pcDNA3) was transfected as negative control. Bands at approximately 35 kDa corresponds to Myc\_ABI\_cTEVp (b) or Myc\_ABI\_cPPVp (c) and bands at approximately 48,5 kDa correspond to HA\_PYL1\_nTEVp (b) or HA\_PYL1\_nPPVp (c). Transfection mixtures are listed in **Supplementary Table 7**.
